# Supplementary material for: Effects of GnRHa treatment during vitellogenesis on the reproductive physiology of thermally challenged female Atlantic salmon (Salmo salar)
Source: PeerJ. 2017 Oct 20;5:e3898. doi: 10.7717/peerj.3898 (PMC5652270; doi:10.7717/peerj.3898)
Supplement: Supplemental Information 1 [file peerj-05-3898-s001.xls]

## Sheet: Sample 1 - 29-10-08
Group	Fish	Length (mm)	Weight (kg)	Condition Factor	Gonad Wt. (g)	Gonad sub-sample (g)	G.S.I. (%)	Follicle Count	Fecundity	Relative Fecundity	Follicle Diameters (mm)
											1	2	3	4	5	6	7	8	9	10	11	12	13	14	15	16	17	18	19	20	21	22	23	24	25	26	27	28	29	30	31	32	33	34	35	36	37	38	39
1	1	580	3.34	1.71184	16	0.413	0.00479042	285	11041.2	3305.74	1.3	1.3	0.9	1.1	0.9	1.4	1.2	1.3	1.2	1.1	1.3	1.1	1.4	1.4	1.5	1.3	1.4	1.3	1.4	1.3	1.3	1.4	1.3	1.2	1.2	1.3	1.2	1.1	1.5	1.5	1.4	1.2	1.2	1.2	1.4	1.3	1.2	1.4	1.3
Maiden	2	590	3.3	1.60679	24	0.289	0.00727273	94	7806.23	2365.52	1.2	1.8	1.9	1.8	1.8	1.7	1.5	1.8	1.9	1.5	1.3	1.5	1.8	1.8	1.5	1.9	1.8	1.8	1.8	1.5	1.8	1.9	1.8	1.8	1.8	1.2	1.5	1.8	2	1.7	1.3	1.5	1.7	1.8	1.9	1.5	1.5	1.7	1.9
	3	565	2.56	1.41937	10	0.165	0.00390625	186	11272.7	4403.41	1.4	1.3	1.3	1.2	1.2	1.1	1.2	1.2	1.3	1.3	1.1	1.4	1.2	1.3	1.4	1.5	1.4	1.3	1.2	1.2	1	1.1	1.4	0.8	1.5	1.3	1.4	1.2	1.2	1.2	1.4	1.2	1.3	1.2	1.2	1.2	1.2	1.1	1.2
	4	590	3.14	1.52888	11	0.18	0.00350318	192	11733.3	3736.73	1.2	1.1	1.2	1.2	1.1	1.3	1	1.2	1	1	1.3	1.2	1.2	1	1.2	1.2	1.2	0.9	1.2	1.1	1.2	1.2	1.2	1.1	1.2	1.2	1.2	1.1	1.2	1.1	1.2	1.3	1.1	1.2	1.2	1.2	1.2	1.3	1.1
	5	570	2.98	1.60913	12	0.128	0.00402685	141	13218.8	4435.82	1.2	1.2	1.1	1.2	0.9	1.1	0.9	1	1.2	1.2	1.2	1.1	1.2	1.2	1.3	1.3	1.2	1.3	1.2	1.3	0.9	1.3	1.2	1.2	1.1	1.1	1.1	1.2	0.8	0.9	1.2	1.2	1.2	1.4	1.2	1.2	1	1.2	1.3
	6	655	4.88	1.73658	21	0.195	0.00430328	152	16369.2	3354.35	1.2	1.2	1.2	1.3	1.2	1.2	1.3	1.2	1.4	1.4	1.3	0.9	1.2	1.2	1.2	1.1	1.2	1.4	1.2	1.3	1.2	1.2	1.2	1.2	1.3	1.3	1.2	1.2	1.4	1.2	1.3	1.2	1	1.3	1.1	1.1	1.3	1.2	1.2
	7	560	2.82	1.60578	14	0.173	0.00496454	150	12138.7	4304.51	1.2	1.2	1.3	1.2	1	1.1	1.3	1.2	1.4	1.3	1.1	1.3	1.2	1.2	1.4	1.2	1.2	1.2	1	1.1	1.2	1.3	1	1.2	1.3	1.3	1.1	1.3	1.2	1.2	1.3	1.3	1.4	1.4	1.2	1.1	1.3	0.8	1.1
	Mean	587.143	3.28857	1.60262	15.4286	0.220429	0.00468103	171.429	11940	3700.87
	SEM	12.1429	0.28465	0.0405216	1.9983	0.0371393	0.000472266	22.5155	971.948	286.969
2	1	700	5.26	1.53353	34	0.35	0.00646388	185	17971.4	3416.62	1.4	1.2	1.2	0.9	1.2	1.3	1.5	1.4	1.3	1.4	1.2	1.2	1.5	1.2	1.4	1.2	1.3	1.5	1.5	1.3	1.2	1	1.3	1.1	1.2	1.1	1.1	1.2	1.3	1.1	1	1.2	1.2	1.2	1.3	1.4	1.2	1.3	1.1
Repeat	2	730	5.84	1.50122	42	0.606	0.00719178	227	15732.7	2693.95	1.5	1.5	1.6	1.5	1.5	1.4	1.5	1.4	1.5	1.5	1.3	1.4	1.2	1.5	1.3	1.6	1.4	1.2	1.4	1.5	1.5	1.4	1.5	1.3	1.5	1.4	1.4	1.5	1.4	1.5	1.4	1.6	1.7	1.3	1.5	1.5	1.5	1.5	1.5
	3	740	5.46	1.3474	23	0.309	0.00421245	241	17938.5	3285.44	0.9	0.9	0.9	1.1	1.1	1.1	1.1	1	0.9	1.1	1.1	0.9	1.1	0.9	0.9	0.8	1	1	0.9	0.9	0.9	0.9	0.9	0.9	1.1	1.1	0.9	1	1.1	0.9	0.9	0.9	1.1	1.1	1.1	0.9	0.9	1	1
	4	670	3.54	1.17701	30	0.306	0.00847458	175	17156.9	4846.57	1	0.9	0.9	1.1	1.2	1.2	1.2	1.2	1.1	1.2	1.1	1.1	1	1.1	1.2	1.2	1.1	1	1.2	1.1	1.1	1.2	1.1	1.2	1.2	0.9	0.9	1	1.1	0.9	1.1	1	1	1.2	1.2	1.1	1.2	1.2	1.2
	5	680	4.86	1.54564	44	0.375	0.0090535	148	17365.3	3573.11	1.4	1.3	1.5	1.2	1.5	1.5	1.4	1.5	1.4	1.3	1.3	1.3	1.5	1.5	1.5	1.7	1.2	1.4	1.4	1.6	1.2	1.3	1.2	1.2	1.4	1.4	1.4	1.5	1.4	1.5	1.5	1.4	1.2	1.3	1.5	1.5	1.5	1.5	1.4
	6	730	6.14	1.57834	26	0.349	0.00423453	182	13558.7	2208.26	1.1	1	1.1	1.2	1.1	1	1.2	1.1	1.2	1.2	1.3	1.1	1.2	1.2	1.2	1.2	1	1	1.1	1.1	1.2	1.1	1.2	1.2	1.1	1.2	1.1	1.1	1.3	1.1	1.2	1.1	1	1.1	1.2	1	1.3	1	1.2
	7	730	5.78	1.4858	20	0.229	0.00346021	198	17292.6	2991.8	1.1	0.9	0.9	0.9	0.9	1	1	1	1	1.1	0.9	0.9	0.9	0.9	0.9	0.9	1	1	1	0.9	1.1	1.1	0.9	1	0.9	1.1	1.1	1	1	0.9	1	0.9	1	1.1	1.1	0.9	1.1	1	1.1
	Mean	711.429	5.26857	1.4527	31.2857	0.360571	0.00615585	193.714	16716.6	3287.97
	SEM	10.5624	0.328745	0.0537854	3.48271	0.0446248	0.000840573	11.9676	596.703	313.712
t value		-7.723	-4.553	2.234	-3.949		1.529		-4.188	0.971
P		0.0001	0.001	0.047	0.003		0.00159		0.002	0.351
[truncated: 30 more columns]

## Sheet: Sample 2 - 22-01-09
Group	Fish	Length (mm)	Weight (kg)	Condition Factor	Gonad Wt. (g)	Gonad sub-sample (g)	G.S.I. (%)	Follicle Count	Fecundity	Relative Fecundity	Follicle Diameters (mm)
											1	2	3	4	5	6	7	8	9	10	11	12	13	14	15	16	17	18	19	20	21	22	23	24	25	26	27	28	29	30	31	32	33	34	35	36	37	38	39
1	1	635	4.25	1.65985	191.8	1.7	0.0451294	74	8348.94	1964.46	3	3.8	3.8	3.9	3.4	3.2	3.8	3.9	3.8	3.6	3.5	3.6	3.5	2.6	3.2	4	3.7	3.6	3.7	3.6	3.7	4.2	3.9	4	2.2	3.2	3.8	3.7	4.1	3.9	4	3.5	2	3.9	3.1	3.6	3.6	4.1	3.7
Maiden	2	655	4.65	1.65474	146.9	1.4	0.0315914	81	8499.21	1827.79	3.3	3	3.5	3.2	2.7	3.5	2.9	3.3	3.3	3.6	3.4	3.6	3.2	2.4	3.8	3.4	3.7	3.4	3.2	3.3	3.5	2.8	3.7	3.6	2.8	2.9	3.3	3	3.6	2.8	3.4	2.9	3.5	3.8	3.7	2.8	3.6	3	3.4
	3	615	3.7	1.59066	131.3	1.8	0.0354865	96	7002.67	1892.61	3.8	3.8	3.3	3.4	3.6	3.4	3.7	2.1	3.6	3.2	3.7	3.7	3.1	3.4	3.6	3	3.7	3.5	3.5	3.5	3.4	3.4	3.5	3.5	3.4	2.9	3.7	3.5	3.6	3.3	3.7	3.7	2.2	3.4	3.9	3.6	3.5	3.3	3.6
	4	655	4.6	1.63694	177.2	1.2	0.0385217	71	10484.3	2279.2	3.7	3.2	3.2	3.3	3.7	3	2.2	3.4	3.4	3.4	3.3	2.7	3.7	3.3	3.4	3.1	3.5	3.5	3	3.5	2.7	3.3	3.1	3.2	3.4	2.3	3.5	2.6	3.7	3.4	3.3	3.4	3.5	3.6	3.4	3.7	3.4	3.3	3.3
	5	640	4.2	1.60217	158.6	1.3	0.0377619	101	12322	2933.81	2.2	3.2	2.3	3.2	2.6	2.9	3	3.6	3.3	2.8	3.1	3.4	3.4	3.2	2.9	2.1	3.3	3.4	3.1	3.5	2.8	3	2.9	3.4	3	2.9	3	2.9	3	2.5	3	3.2	3.1	3.1	3	3.1	2.9	3.2	3.4
	6	610	4.1	1.80632	184	0.7	0.044878	50	13142.9	3205.57	3	1.9	2.2	3.1	3.3	2.6	3.3	3.6	2.1	3	2.5	3.4	3.2	2.5	3.7	2.6	3.1	3.2	3.4	3.1	2.9	2.4	3.2	3.9	2.4	3.7	2.3	3.5	3.6	2.8	3.3	3.2	1.8	2.7	3.2	3.4	3.9	3.3	3.2
	7	610	4.4	1.93849	200.5	1.1	0.0455682	61	11118.6	2526.96	2.5	3.6	3.2	3.6	3.7	3.7	2.6	3.9	3.8	2.9	4	3.4	3	1.9	2	3.6	3.1	3.6	2.5	3.6	4	3.2	4.1	2.5	3.9	3.1	2.6	2.5	3.2	3.8	4	3.9	4	2.9	3.9	2.1	4.1	3.5	3
	Mean	631.429	4.27143	1.69845	170.043	1.31429	0.0398482	76.2857	10131.2	2375.77
	SEM	7.53676	0.122405	0.0481384	9.53012	0.140456	0.00206571	6.86507	853.522	203.252
2	1	705	5.95	1.69805	123.4	1	0.0207395	91	11229.4	1887.29	2.7	2.9	2.6	2.6	2.9	2.9	2.8	2.4	2.5	2.9	2.1	2.7	2.8	2.1	2.9	2.7	2.5	2.8	2.7	1.2	1.7	2	2.4	2.1	2.8	3	2	2.2	2.3	1.9	2.8	2.5	2.5	3.2	2.4	2.4	2.7	2.1	2.8
Repeat	2	840	10.85	1.83059	276.6	1.1	0.0254931	90	22630.9	2085.8	3.2	2.4	3.3	3.1	3.5	3.1	2.9	2.9	2.9	3.2	3.4	2	2.8	3.3	2.8	3.1	2.2	3	3.2	3.2	3.4	3	3	3.1	3.4	3	3.3	3.2	2.5	3.3	3.4	3.1	3.4	3	3.1	3.3	3	3.3	3
	3	770	8.55	1.87281	321.2	0.8	0.0375673	51	20476.5	2394.91	1.9	2.1	2	3.5	3.4	3.9	1.9	2.8	2.5	3.3	3.8	3.4	3.7	3.7	3.6	2.7	3.6	3.9	3.1	3	3.6	3.7	3.5	3.5	3.8	3.8	3.7	2	2.4	3.3	3.7	3.3	3.2	3.6	2.5	3.6	3.7	2.6	3.8
	4	725	6.45	1.69257	234.5	1.4	0.0363566	76	12730	1973.64	3.3	3.2	2.2	3.7	3.2	3	3.5	3.6	3.2	3.2	3.5	2.5	3.9	2.9	3	3.2	3.8	3.1	3.6	3.4	2.7	4	3.1	3.6	3.4	3	3.9	2.7	3.3	3.5	3.4	3.1	3.5	3.3	2.5	3.6	3.7	3.4	3.7
	5	710	6.3	1.76021	105	0.8	0.0166667	156	20475	3250	1.9	2.1	1.8	2.3	2.2	1	2.4	2.3	1.7	2.5	1.7	2.6	2.2	2.3	2.3	2.4	1.1	2.6	2	1.9	2.3	1.9	1.4	2.6	1.8	2.1	2.5	1.6	2.4	1.2	1.8	2.4	2.2	1.7	2.2	2.6	1.8	2.2	1.9
	6	730	7	1.79941	121	0.9	0.0172857	128	17208.9	2458.41	1.6	2.2	2.4	2.1	2	2.4	2.5	2.2	2.2	1.5	2.5	2.3	2.1	2.8	2.6	1.9	2.2	2.2	2.4	2.8	2	2.5	2.4	2.6	2.8	2.4	2.5	2.7	2	2.2	2.6	2.5	2.7	2.6	2.1	2.5	2	2.4	2.1
	7	775	8.75	1.87976	287.5	1	0.0328571	76	21850	2497.14	2.9	3	2.1	2.8	3	3.5	2.5	3.2	2.7	3.3	3.2	3	3.3	3	3.4	3.4	3	2.5	2.8	2.8	3.5	2.9	2	3.3	3	2	2.9	2.6	3.4	3.3	3.5	3.4	2.9	3.5	3.1	3.1	2.5	3	3.3
	Mean	750.714	7.69286	1.79049	209.886	1	0.0267094	95.4286	18085.8	2363.89
	SEM	18.1078	0.669437	0.0290671	34.4525	0.0786796	0.00336487	13.3699	1709.32	173.865
t value		-6.082	-5.082	-1.615	-1.115		3.321		-4.163	0.045
P		0.0001	0.002	0.138	0.302		0.008		0.003	0.965
[truncated: 30 more columns]

## Sheet: Sample 3 - 25-02-09 
Group	Fish	Length (mm)	Weight (kg)	Condition Factor	Gonad Wt. (g)	Gonad sub-sample (g)	G.S.I. (%)	Follicle Count	Fecundity	Relative Fecundity	Follicle Diameters (mm)
											1	2	3	4	5	6	7	8	9	10	11	12	13	14	15	16	17	18	19	20	21	22	23	24	25	26	27	28	29	30	31	32	33	34	35	36	37	38	39
1	1	660	4.4	1.53046	191.2	4	0.0434545	173	8269.4	1879.41	3	3.3	3.6	3.2	2.5	2.8	2.8	3.2	3.2	3.2	3.4	3.7	3.3	3.6	3.3	3.5	3.5	3.2	3.3	3	3	3	2.8	3.3	3.5	2.8	3.8	3	3.2	3.3	2.6	2.8	2.5	3.3	3.5	3.3	3	3.2	3.3
Maiden	2	655	4.9	1.7437	312.3	3.7	0.0637347	109	9200.19	1877.59	3.7	4	3.8	3.8	3.8	4	4	4	4.2	4	2.5	4.2	3.6	3.6	4.2	2.5	4.3	4.2	4.1	4.1	4	3.2	4.2	4	4	3.8	3.8	4	3.8	3.1	2.7	3.8	4	3.8	3.5	3	3.4	4	3.5
	3	585	3.15	1.57341	137.3	4.3	0.0435873	189	6034.81	1915.81	3.6	3.1	3.3	3.3	3.8	3.6	3.2	3.6	2.9	3.5	3.2	3.1	3.3	3.2	3.1	3.1	3.6	3.6	3.2	3.2	3.6	3.3	2.9	3.6	3.5	3.1	3.1	2.5	2.3	3	3.2	3.5	2.8	2.9	3.3	3.5	2.6	3	3.2
	4	645	4.35	1.6211	212.7	3.1	0.0488966	141	9674.42	2224	3.8	3.6	3.5	2.5	1.8	2.2	3.7	3	2.4	3.7	3.2	3.8	2.8	3.2	3.6	3.6	2.8	3.4	3.9	3.8	4	3.6	3.6	3.8	4	3	2.1	3	3.8	3.7	3	3	4	3.8	4	3.5	3.7	2.2	2.7
	5	675	3.95	1.28436	163.4	4.7	0.0413671	208	7231.32	1830.71	2.8	3.2	3.4	2.8	3	3.2	3.4	3	3	2.7	2.9	3.3	3.3	3.6	3.3	2.9	2.8	3.5	3.5	3.1	3.3	3.5	2.8	2.8	3.5	3	3.2	3	3.1	3	2.8	3.1	3.5	3.3	3.1	3.3	3.3	3.4	3.3
	6	720	5.35	1.43336	275.5	4.3	0.0514953	150	9610.47	1796.35	3.5	3.5	3.5	3.6	3.8	3.8	3.6	3.7	3.5	3.8	3.4	3.8	3.4	3.5	3.4	3.5	4	3.7	3.7	3.8	3.5	3.2	3.3	4	3.3	3	3.6	3.6	3.7	3.7	3.7	3.6	4	4	3.7	3.6	3.5	3.6	3.5
	7	645	3.95	1.47203	191.2	4.6	0.0484051	132	5486.61	1389.01	3.8	3.8	3.8	3.8	3.5	3.8	3.9	4.1	4	3.9	4	3.7	3.5	3.4	3.7	3.7	3.7	4	3.7	3.3	3.9	3.9	4	3.5	3.5	3.8	3.8	3.9	3.7	4	3.6	4.1	3.6	3.6	3.9	3.5	3.5	4	4
	Mean	655	4.29286	1.52263	211.943	4.1	0.0487058	157.429	7929.6	1844.7
	SEM	15.2362	0.269132	0.0553155	23.3504	0.210442	0.0028511	13.0144	648.177	92.7616
2	1	740	6.75	1.66575	295.1	3.2	0.0437185	97	8945.22	1325.22	3.4	3.8	4.2	3.5	4	3.8	4	3.8	3.6	3.5	3.6	3.8	3.5	3.6	3.7	3.6	3.7	3.5	3.9	3.6	3.6	3.8	3.8	3.2	3.5	4	4	3.7	3.6	4	3.7	4	3.5	3.3	4	3.8	3.5	3.6	4
Repeat	2	750	6.35	1.50519	483.1	4.9	0.0760787	99	9760.59	1537.1	4.5	4.5	4.3	4.9	4.2	4.3	4.1	4.4	3.8	4.5	4.5	5	4.6	4.7	4.7	4.7	4.3	4.5	4	4.8	4.3	4.3	3.2	4.3	4.3	4	4	4.1	5	4.3	4.3	4.3	4.7	4.5	4.8	4.7	4.8	4.6	4.5
	3	810	9.05	1.70292	355.3	6	0.0392597	166	9829.97	1086.18	3.8	4	3.9	4	4.1	3.7	4.2	3	3.2	3.7	3.8	3.3	4	3.6	3.8	3.8	4	3.4	4	4	4	4.1	4	3.6	3.8	4.1	3.7	3.6	3.8	4.2	4.1	3.9	3.6	3.6	4	4	3.6	3.3	3.8
	4	830	8.55	1.49531	298.4	5.7	0.0349006	211	11046	1291.93	3.5	3.3	3.7	3.4	3.3	3.3	3.3	3.3	3.2	3.3	3.4	3.6	3.5	3.5	3.5	3.5	3.5	3.2	3.7	3	3.7	3	3.3	2.7	3.2	3.3	3.3	3	2.5	3.5	2.7	3	3.3	3	3.1	3.3	3.5	3.3	3.2
	5	720	7.55	2.02278	536.9	5.5	0.0711126	120	11714.2	1551.55	4.2	4.3	4.3	4.2	4	3.8	4.4	4.3	4.3	4.3	4.3	4.5	4.3	4.2	4.4	4.7	4.2	3.7	3.8	4.3	4.5	4.1	4.1	4.1	4.3	4.5	4.3	3.7	4.1	4.3	4.3	4.1	4.6	4.1	4.3	4.2	4.2	4	4.5
	6	750	6.55	1.55259	439.4	6.4	0.067084	150	10298.4	1572.28	3.8	4.3	4	4	4	3.8	4.2	3.5	4	3.5	4.2	4	4	3.8	4.2	3.6	4.2	4.2	4	3.8	4	4.3	4	4.3	4	4	4.2	4.1	4	4	3.7	4.1	3.7	3.9	3.8	4	4	4.1	3.7
	7	765	8.3	1.85393	510.3	4.6	0.0614819	110	12202.8	1470.22	4.5	4.3	4.3	4.1	4.5	4.5	4.5	3.5	4	4.3	4.3	4.1	4	4.1	4.3	4.3	4.3	4.3	4.3	3.8	4.5	4.2	3.8	4.3	4.1	3.7	4.1	4.7	3.8	4.1	3.6	4.1	4	3.8	3.8	4.6	4.1	4.1	4
	Mean	766.429	7.58571	1.6855	416.929	5.18571	0.0562337	136.143	10542.5	1404.93
	SEM	14.909	0.404839	0.0738681	38.0114	0.404398	0.00628742	15.8436	439.508	67.6046
3	1	650	4.75	1.72963	225	4	0.0473684	148	8325	1752.63	3.3	3.5	2.3	3.3	3.7	2.8	3.5	3.5	3.3	3.5	3.4	3.3	3.7	3.8	2.2	1.8	3.2	3.5	2.7	3.7	2.2	3.7	3.2	3.5	3.4	3.3	3.7	3.8	3.4	3.7	3.5	3.3	3.3	2.3	2.1	3.5	3.3	3.7	3.4
Maiden	2	630	3.4	1.35974	197	4.9	0.0579412	159	6392.45	1880.13	3.7	3.9	3.6	4.1	4.1	3.9	3.9	4.2	3.7	3.9	4	3.9	3.8	3.4	4	3.9	3.6	3.7	3.9	3.7	3.3	3.9	3.8	3.8	3.7	3.5	4	3.8	3.7	3.2	3.2	3.2	3.9	3.9	3.9	3.1	3.8	3.9	3.5
22 blank	3	650	3.5	1.27447	145.2	5.2	0.0414857	260	7260	2074.29	2.8	3	2.8	3.5	2.8	3.6	2.8	2.4	2.7	3.6	2.9	3.5	3	3.2	3.2	3.5	2.8	3.4	2.6	3.3	3.3	3.5	3.3	3.3	3	3.6	3.6	2.5	2.6	2.6	3.2	3.4	3.2	3.5	3.3	3.3	3	2.2	3.4
	4	580	3.1	1.58883	222.5	5	0.0717742	134	5963	1923.55	3.8	4.2	4	4	4.2	4.2	4.2	4.5	2.7	3	4.2	4.2	4.2	4.2	3.8	4.4	4.3	3	4	3.9	3.8	4	3.3	4.1	4.2	2.7	4.1	4.1	4.3	4.3	4.1	4.2	4.1	4	3.2	3.7	4.4	4.3	4
	5	600	3.35	1.55093	228.2	5.5	0.0681194	165	6846	2043.58	3.2	4	4	3.7	3.6	2.6	3.8	3.7	4.1	3.8	4	3.2	3.3	4	4.1	3.3	3.2	4.1	4	3.6	4	4.1	3.5	3.6	4	4	3.7	3.7	4	2.6	4.1	4.2	4.1	2.6	3.6	4	4	3.8	4.3
	6	620	3.5	1.46856	189.8	4.4	0.0542286	147	6341.05	1811.73	3.8	3.6	3.9	3.7	4	3.1	3.5	3.9	3.1	3.7	2.1	2.7	3	3.2	4.1	3.1	3.9	3.9	3.9	3.1	2.8	3.5	3.7	3.6	3.3	3.6	3.6	3.9	2	3.6	3.7	4	4	3.7	3.8	4.2	3.8	4	2.2
	Mean	621.667	3.6	1.49536	201.283	4.83333	0.0568196	168.833	6854.58	1914.32
	SEM	10.5334	0.220065	0.0620165	11.9913	0.206559	0.00441992	17.3591	320.659	47.8749
4	1	640	4.4	1.67847	293.5	4.8	0.0667045	134	8193.54	1862.17	3.8	4.2	3.8	3.8	3.5	3.7	3.9	3.9	2.8	3.5	3.5	2.7	3.7	3.7	4.5	3.5	4	4.1	3.9	4.3	3.6	4	3.5	4	3.7	4.3	3.5	4	3.7	4	4	4.1	2.5	4.2	3.7	3.3	3.9	4	3.7
Maiden	2	640	4.15	1.5831	235.4	4.4	0.0567229	146	7811	1882.17	3.5	3.6	3.5	3.4	3.7	3.5	3.5	3.3	3.5	3.7	3.6	3.7	3.6	3.5	3.6	3.5	2.8	3.1	2.5	3.5	3.6	3.6	3.5	3.5	3.3	3.6	3.3	3.7	3.3	3.3	3.6	3.7	3.6	3.3	2.3	3.6	3.5	3.5	3.5
22 GnRH	3	655	4.15	1.47681	175.8	4.9	0.0423614	197	7067.88	1703.1	3.2	2.3	3.2	2.3	3.2	2.7	2.2	3.2	3.7	2.8	3.4	2.9	3.7	3.1	3	2.7	3.3	2.3	2.3	2.3	3.3	3.2	3.5	3.3	2.3	3.1	2.4	3.5	3.3	3.2	3.3	2.7	2.5	3.5	3.5	3.7	2.2	3.4	3.3
	4	600	4.15	1.9213		3.9
	5	630	3.73	1.49172	216.8	4.9	0.0581233	154	6813.71	1826.73	3.4	4	3.8	3.8	3.8	3.3	3.5	3.7	3.8	3.5	3.6	3.2	3.9	3.1	3.9	3.8	3.6	3.7	3.7	4	3.6	3.6	3.5	3.7	3	3.5	3.2	3.6	3.7	3.5	3.1	4.1	3.3	3.3	3.3	3.6	3.5	3.5	3.7
	6	600	2.9	1.34259	177.6	4.8	0.0612414	124	4588	1582.07	3.4	3.4	3.4	3.2	3.3	3.1	3.3	3.6	3.3	3.2	3	3.3	3.3	3.8	3.3	3.5	3.5	4.1	3.5	3.7	3.7	3.3	3.3	3.8	3.7	3.8	3.7	3.7	3.3	3.7	3.2	3.7	3.5	3.4	3.5	3.3	3.6	3.7	3.5
	Mean	627.5	3.91333	1.58233	219.82	4.61667	0.0570307	151	6894.83	1771.25
	SEM	8.59817	0.204613	0.0757741	18.3234	0.150079	0.00342151	10.6369	530.633	47.8394
5	1	770	8	1.75234	415.2	4.5	0.0519	176	16238.9	2029.87	2.9	3.4	2	2	3.3	3.4	2.5	2.8	3.7	3.6	3.7	3.6	3.3	3.6	3.9	2.3	3	2.2	3.7	3.8	4	3.5	3.8	3.5	2.6	3.6	3.3	3.7	2.2	3.3	2.2	3.9	3.7	3.1	2.6	3	3.3	3	3.3
Repeat	2	765	7.65	1.70874	577.8	5.1	0.0755294	116	13142.1	1717.92	4.2	4.2	4	3.7	4.2	3.5	4.2	3.8	4.5	4.5	4.2	4.3	4	3.7	4	3	4.3	3.3	4.5	4.2	4	3	3.8	2.8	4	4.5	4.2	4.3	4.2	4.2	4.2	4.6	4.3	3.8	4.6	4.3	4.3	4.2	4.2
blank	3	815	9.6	1.77337	543.9	4.5	0.0566562	145	17525.7	1825.59	3.2	4	2	3.6	3.3	3.3	3.7	3.9	2	4	2.6	3.3	2.9	2.2	2.9	3.9	3.9	3.8	3.7	3.8	3.6	3.8	1.8	2.7	3.8	3.7	3.7	2.2	3.7	3.3	4.1	3.8	3.8	3.5	3.9	2.6	3.6	3.6	3.2
	4	780	7.95	1.67526	424.7	4.5	0.0534214	161	15194.8	1911.3	2.5	3.5	3.7	3.4	3.8	3.6	3.8	2.6	3.6	3.8	3.7	2.8	2.5	3.7	2.9	3.9	3.8	2.3	4	2.2	3.2	2.3	4	3.7	3	3.3	3.7	3.6	2.3	3.8	2.5	4	2	4	2.4	3.5	3.5	4	3.5
	5	805	8.05	1.54315	342.2	5	0.0425093	252	17246.9	2142.47	2.5	2.6	3.5	3.3	3	3.3	3.3	2.6	3.2	3.3	3	2.8	3	3.2	3	3.1	3	3.1	2.5	2.8	3.1	3.4	3	3.4	3.5	2.8	3.7	2.1	2.2	3.3	3.3	2.8	3.3	3.2	3.3	3.5	3.6	3.6	3.3
	6	710	5.65	1.5786	300.7	4.9	0.0532212	174	10677.9	1889.9	3.2	3.5	2.3	2.7	3.5	3	3.8	3.7	2.2	3.2	3.3	3.7	3.6	3.5	3.5	2.3	3.2	3.6	3.8	3.6	3.5	2.2	2.6	3.5	3.8	2.8	3.5	3.5	4	3.7	3	2.8	3.8	3.7	2.3	2.6	3.3	3.6	3.6
	Mean	774.167	7.81667	1.67191	434.083	4.75	0.0555396	170.667	15004.4	1919.51
	SEM	14.0111	0.47834	0.0352197	41.1938	0.106234	0.00411872	17.234	1001.89	56.6422
6	1	760	7	1.59462	439.8	5.1	0.0628286	152	13107.8	1872.54	3.8	3.5	3.7	3.8	3.5	3	3.8	2.9	3.5	2.2	3.8	3.7	3.8	3.7	3.8	3.8	3.3	3.5	3.5	3.6	3.6	3.2	3.9	3.3	3.3	3.7	3.9	3.4	3.2	3.3	3.4	3.6	3.7	3.7	3.9	3.9	4	3.3	3.3
Repeats	2	835	9.75	1.67473	755.5	4.9	0.0774872	126	19427.1	1992.53	3	4.3	4.5	3.1	4	3.5	4	3.7	4	4.2	4	3.9	4.2	4.2	3.9	4	4.2	3.9	4.2	3.2	4.3	3.8	4.2	3.4	4	4.5	4.5	3.7	4.2	4	2.6	3.4	4.3	3.9	3.6	4	4.3	4	4
22 GnRH	3	770	7.75	1.69758	486.8	5.4	0.0628129	129	11629.1	1500.53	4	4	4.2	4.6	4	4	4.2	3	3.5	4.5	4.3	4	4	4.5	4.3	4.3	4.3	4	4	4.3	3.8	4.4	4.2	4.5	3.9	4.3	4.2	4.1	4.3	4	3.9	4.3	4.2	4	4	4.2	3.5	3.3	4.3
	4	725	6.2	1.62696	425.2	4.7	0.0685806	135	12213.2	1969.87	4	2.6	2.7	3.7	4	2.5	4.2	4	4.2	4	3.5	3.5	3.5	3.5	3.7	4.1	3.7	2.6	3.7	4	2.7	3.7	4	4	3.3	3.7	4	4	3.2	4	4	4	4	4.1	3.5	3.8	3	4	4.2
	5	755	6.2	1.44062	342.5	4.9	0.0552419	156	10904.1	1758.72	3.6	3.5	4	4	4	4	3.8	3.8	3.9	3.7	3.9	3.9	3.7	3.7	3.2	3.9	3.3	4	3.5	3.8	3.9	3.8	3.5	4	3.6	4	3.8	3.9	3.8	3.8	3.8	3.8	3.8	4	3.1	4.1	4	3.5	4
	6	770	8.3	1.81805	453.3	5.1	0.0546145	212	18843.1	2270.25	3.2	3.3	3.3	3.3	3.6	3.3	3	3.3	2.3	3.3	2.8	2.6	3.3	3.3	3.6	3.3	3.7	3.5	2.5	3.2	2.8	3.4	3.8	3.8	2.8	2	3.3	3.4	2	3.6	3.2	3.5	3.5	3.3	3.4	3.4	3.4	3.4	3.5
	Mean	769.167	7.53333	1.64209	483.85	5.01667	0.0635943	151.667	14354.1	1894.07
	SEM	13.7018	0.517917	0.0472612	53.4778	0.090764	0.00324905	12.0823	1427.8	97.1898
F value		28.692	27.514	1.619	12.462		0.01136		17.271	7.171
P		0.0001	0.0001	0.183	0.0001		0.00363		0.0001	0.0001
Group 1		a	a	a	a		a		ab	b
Group2		b	b	a	b		a		ab	a
Group3		a	a	a	a		a		a	b
Group4		a	a	a	a		a		a	b
Group5		b	b	a	b		a		b	b
Group6		b	b	a	b		a		b	b
[truncated: 15 more columns]

## Sheet: sample 4 26-03-09
Group	Fish	Length (mm)	Weight (kg)	Condition Factor	Gonad Wt. (g)	Gonad sub-sample (g)	G.S.I. (%)	Follicle Count	Fecundity	Relative Fecundity	Follicle Diameters (mm)
											1	2	3	4	5	6	7	8	9	10	11	12	13	14	15	16	17	18	19	20	21	22	23	24	25	26	27	28	29	30	31	32	33	34	35	36	37	38	39
1	1	655	4.2	1.4946	377.8	4.2	0.0899524	69	6206.71	1477.79	4.5	4.5	4.9	4.7	4.2	4.3	4.9	4.9	5	4.6	4.5	5	5.1	4.9	3.7	5	5.2	4.3	4.3	3	5	4.7	4.2	4.7	4.2	5	4.9	5	4.8	4.8	4.8	5	5	4.5	4.2	4.7	4.7	4	4.5
Maiden	2	625	3.7	1.51552	484.6	6.3	0.130973	78	5999.81	1621.57	5.3	5	5.3	5.1	5	5.3	5.2	5.3	5.2	5.2	5.2	5.4	5.4	4.7	5.3	5	5.3	5	5	5.1	5	5	5	5.1	5.2	4.7	5	5	4.8	5	5	5.2	4.8	5.4	5.5	4.7	5.4	5.2	5.2
	3	660	4.25	1.47828	427.9	5.2	0.100682	73	6007.06	1413.43	5	4.8	4.7	4.3	4.3	3.8	4	4.5	5.2	4.2	4.7	4.9	4.6	4.2	4.7	4.9	4.8	4.3	4.7	4.3	4.8	4	4.8	4	4.6	4.2	4.7	4.2	4.7	4.8	3.8	5	4.7	3.5	4.5	4.7	4.7	4.5	5
	4	660	2.9	1.00871	559.6	4.9	0.192966	69	7880.08	2717.27	5	5	4.5	4.7	5	4.2	4.7	4.9	4.8	4.8	4.8	5.2	4.7	4.7	4.3	4.8	4.8	3.8	4.7	4.3	4.8	4.8	4.3	4.3	5	4.6	5.5	5.1	4.5	4.7	4	5	4.8	5.5	4.8	4.8	5	4.3	4
	5	715	5.3	1.44997	568.7	5.1	0.107302	96	10704.9	2019.8	4.8	4.5	4.6	4.6	4.5	4	4.8	4.7	4.5	4.7	5	4.2	4.3	4.3	4.3	4.5	4.7	4	4.3	4.7	4.5	4.5	4.5	4.5	4.6	4.8	4.7	4.6	4.6	4.2	4.7	4.5	4.8	4.7	5	4.6	4.8	4.8	4.3
	6	655	4.15	1.47681	299.6	4.9	0.0721928	90	5502.86	1325.99	4.8	4.5	4.3	3.9	4.6	4.3	4.6	4.2	4.3	4.2	4.6	4.5	4.5	4.5	5	4.6	4.2	3	4.2	4.5	4.2	4.6	4.2	4.3	4.5	4.7	4.5	4.8	4.5	4.7	4.2	4.8	4.3	4	4.3	4.3	4.5	4.8	4.6
	7	630	3.6	1.43973	350.5	5.1	0.0973611	79	5429.31	1508.14	4.7	4.8	4.8	4	4.8	4	5	4.5	4.8	5	4.5	4.3	4.2	4.2	4.5	4.7	5	4.6	5.2	4.6	4.3	4.2	4.8	4.6	4.8	4.5	4.6	4.7	4.8	4.2	4.7	4.7	4.9	5	5	4.2	4.3	4	4.7
	Mean	657.143	4.01429	1.40909	438.386	5.1	0.113061	79.1429	6818.68	1726.28
	SEM	11.0657	0.279181	0.0674231	39.2114	0.236039	0.0149146	3.92446	717.056	185.589
2	1	705	5.35	1.52682	422.2	3.7	0.0789159	58	6618.27	1237.06	4.8	4.6	4.7	4.7	4.3	4.2	4.8	4.8	4.9	4.9	4.8	4.5	4.8	4.2	4.4	4.5	4.2	4.8	4.4	4.2	5	4.7	5	3.8	4	3.5	4.7	4.2	4.8	5	4.9	4.8	4.2	4.5	4	5	4.5	4.5	4.5
Repeat	2	755	7.55	1.75431	715.2	4.6	0.0947285	67	10417	1379.74	4.2	4.2	4.2	4.2	4.2	4	4.8	4.3	4.5	4.3	4.6	4	4.8	4.6	4.3	4	4.3	4.3	4	4.5	4.2	4.5	4.3	3.8	4	4.3	4.3	4.3	4.3	4.2	4.2	4.2	3.5	4.5	4.2	4.6	4.5	4.8	4.4
	3	755	7.45	1.73107	759.2	4.4	0.101906	76	13113.5	1760.2	4.7	4	4.2	4	4.2	4.6	4.5	4.5	4	4.5	4.3	4.2	4.5	4.3	4.4	4.2	4.5	4.6	4.8	4.8	4.3	4.3	4.6	4.6	4.3	4.3	4.3	4.5	4.5	4.3	4.5	4.4	4.8	4.7	4.7	4.6	4.9	4.2	4.3
	4	770	8.2	1.79615	537.2	4.9	0.0655122	120	13155.9	1604.38	4.2	4	3.8	3.9	3.9	4	4.5	3.9	3	4.2	3	3.9	3.2	3.3	4	4.1	4	4	4.1	4.3	4.1	3.8	3.8	4	4	4.1	3.8	3.7	3.6	3.7	4	4.1	4	4	4	4.1	4	3.8	3.8
	5	805	7.25	1.38979	464.5	4.2	0.064069	91	10064.2	1388.16	3.9	4.3	4.2	4	4.1	4.2	4.3	4.3	4.2	4	3.6	3.3	4.3	3.3	3.9	4.1	4.2	4	3.5	3.9	4.2	4.3	4.2	4.3	4.3	4	4	4.2	4	4	4	4	4.3	4.5	4.2	4.1	4	4	4
	6	770	6.8	1.48949	544.6	5	0.0800882	89	9693.88	1425.57	4.2	3.6	4.5	3.2	3.8	3.8	4	3.6	4	4.2	3.2	4.6	4	4.2	4	4.1	4.5	4.3	4	4.2	4.2	4	4.2	4.3	3.8	4.1	4.2	4.5	3.8	4	4	4.5	4.6	4.2	4.5	4.5	4.3	4	4.5
	7	820	8.8	1.59603	659.8	5	0.0749773	95	12536.2	1424.57	4.3	4.3	4.3	4.2	4	3.8	4	3.6	4	4.2	3.2	4.6	4	4.2	4	4.1	4.5	4.3	4	4.2	5	4.8	4.3	4.5	4.2	4.2	4.7	4.6	4.5	4.3	4.3	4.7	4.3	4.2	4.2	4.5	4.3	4.2	4.2
	Mean	768.571	7.34286	1.61195	586.1	4.54286	0.0800282	85.1429	10799.8	1459.95
	SEM	14.1301	0.413669	0.0577838	48.2615	0.182388	0.00531597	7.7319	890.63	64.4959
3	1	640	3.7	1.41144	600.5	5.2	0.162297	68	7852.69	2122.35	5	5	4.8	4.7	4.8	5.2	4.8	5.2	5	5	4.9	5	5	4.7	5	4.8	5	5.2	5	5	4.8	4.8	5	5.1	5.1	5	4.8	4.6	5	4.3	4.3	4.8	4.2	5	4.2	4.2	4.5	5	4.5
Maiden	2	670	4.15	1.37982	572.8	5.2	0.138024	62	6829.54	1645.67	4.6	4.8	4.7	5	4.6	4.7	4.8	5	4.5	4.7	4.7	4.8	4.8	4.7	5.3	4.8	5.1	4.6	4.8	5	4.9	5	4.7	5	5	4.8	4.9	4.6	4.8	4.8	4.8	4.5	5	4.7	4.9	4.3	4.8	5	4.8
22 blank	3	615	3.6	1.54767	449.3	5	0.124806	98	8806.28	2446.19	4.2	1.8	2.4	4.5	4.2	4.4	3.2	4.6	3	4.7	3.8	3.3	4.5	3.5	4.8	4	2.1	4.2	3.8	3.4	4.2	4	4.5	4.4	2.6	2.1	2	3.2	4.5	3.7	4.3	2.2	4	4	4	4.6	4.2	3.8	3.8
	4	645	3.6	1.3416	428.5	4.9	0.119028	67	5859.08	1627.52	4.7	4.6	4.3	4.8	4	4.6	5	4.3	4.5	4.5	5	4.9	5	5	5	4.7	5	4.6	4.9	4.8	5	5	5	4.3	4.8	4.7	4.8	4.8	5	5	4.6	5	5	4.8	5	4.7	5.1	4.9	5
	5	610	2.9	1.27764	286.3	4.5	0.0987241	85	5407.89	1864.79	4.5	2.9	4	4.2	4.3	3.8	4.2	4	4	4.2	3.2	4	4.5	4.2	4.5	3.5	4	4.3	3	4.5	3.8	3.7	3.8	3.5	4.5	3.6	3.2	3.5	4	4	4.5	4.7	4	4.8	4.3	3.5	4	3.6	3.7
	6	635	4.25	1.65985	569.2	5.3	0.133929	77	8269.51	1945.77	4.2	4.3	4.1	4.1	4	4	4.2	4.5	4.5	4	4.3	4.3	4.2	4.2	3.9	4.8	4.5	4.5	4.5	4.7	4.8	4.8	4	4.6	4.8	4.8	4.5	4.5	4.5	4.3	4	4.2	4.5	4.8	4	3.5	4	4	4.2
	7	640	4.35	1.65939	495.7	5.1	0.113954	98	9525.22	2189.7	4.2	4.5	4	4	4.2	4	4	4.3	3.6	3.6	4	3.9	4	4.5	3	4	4	4	4.2	3.4	4	4.2	3.9	4.2	3.8	4.2	4	3.8	3.2	4	3.8	3.9	3.5	3.7	4	4.2	4	4	2.5
	Mean	636.429	3.79286	1.4682	486.043	5.02857	0.127252	79.2857	7507.17	1977.43
	SEM	7.53676	0.190684	0.0583443	41.4597	0.101686	0.00764245	5.5964	578.238	112.545
4	1	665	4.3	1.46219	495.1	4.8	0.11514	68	7013.92	1631.14	3	3.8	4.2	4.2	3.4	4	4.5	4.2	4.3	4	4.5	4.5	4.3	4.2	4.5	4.2	4.3	4.5	4.2	4.2	3	4	4	4.4	4.6	4.1	4	4.5	4	4.2	4.3	4.1	4	4.5	4.5	4.1	4	3.8	3.5
Maiden	2	610	3.75	1.65212	466.6	5.1	0.124427	93	8508.59	2268.96	4.2	4	4.8	4	4.2	4.2	4.3	4.4	4.2	4.3	4.5	4.5	4.2	3.7	4	3.1	4	3.7	4.2	4.1	4.5	4.5	4.5	4	4.5	3.5	3.3	4.2	4	4.3	4.7	4.3	4.3	4.2	4.2	4.3	3.2	4.5	3.7
22 GnRH	3	605	3.5	1.58053	220.2	4.7	0.0629143
	4	645	3.8	1.41613	125.5	5.3	0.0330263
	5	610	3.95	1.74023	591	5	0.14962	64	7564.8	1915.14	5	4.6	4.7	4.8	5	4.5	4.1	4.7	4.8	4.9	4.9	4.9	5.3	5	4.8	5.3	5	5	5	5.2	4.5	4.9	4.8	5	4.9	4.8	4.8	4.7	4.5	4.8	5	4.8	4.8	4.5	4.8	4.2	4.5	4.2	4.9
	6	650	4.3	1.56577	334.4	5	0.0777674	81	5417.28	1259.83	4.3	4.2	3.8	4	4.2	4.2	4	4.1	4	4	4.3	4	4	4.2	4	3.9	4	4	4.2	4.2	4	3.9	3.8	4.3	4	4.3	4	4.3	4.2	4	4.2	4.5	4.2	4.2	4.1	4.1	4	4.2	4.3
	7	545	2.5	1.54437	255.7	5.1	0.10228	98	4913.45	1965.38	4.2	4.2	3.9	4.3	4	3.5	4	4.1	4.5	4.5	4.1	4.7	4	3.8	3.6	4.2	4	4.3	3.5	3.7	4.2	4.2	5.4	4.5	4.5	3.8	3.6	3.5	4.2	3.3	4.2	3.8	4.2	4.2	4.6	4.3	4.7	4.5	3.9
	Mean	618.571	3.72857	1.56591	355.5	5	0.0950249	80.8	6683.61	1808.09
	SEM	15.1073	0.232445	0.0413146	63.4153	0.0755929	0.0150199	5.64042	565.471	143.986
5	1	755	7.95	1.84725	1088.5	5.4	0.136918	63	12699.2	1597.38	5	4.9	4.8	4.9	4.5	4	4.8	4.8	5	4.8	5	4	5	4.9	4.8	5	4.8	4.3	4.9	5	5	5	5	5	4.9	4.9	5	5	4.7	4.8	4.3	5	4.5	4.7	4.1	4.8	5	5	4.8
Repeat	2	835	9.65	1.65755	1118.3	4.9	0.115886	62	14149.9	1466.31	5	5	4.6	4.8	4.8	5.1	3.9	5.2	5	4.6	5	4.9	4.5	4.5	4.8	4.9	4.3	4	5	4.6	5	4.6	4.7	4.6	5	4.3	4.3	4.8	4.8	4.8	4.7	4.8	5.3	5	5.2	4.4	4.8	4.5	4.7
blank	3	800	8.3	1.62109	1077.5	4.8	0.129819	71	15938	1920.24	4.9	5	4.9	4.8	4.3	4.6	4.8	5	4.5	4.5	4.3	4.2	4.8	4.5	4.5	4	4.5	5	4.5	5.1	5.1	5	4.7	4.5	4.2	4.8	4.3	4.5	4.5	4.8	5	5.1	4.5	4.8	4.3	5	5	4.7	4.8
	4	720	5.65	1.51374	580.9	4.9	0.102814	81	9602.63	1699.58	4.7	4.5	4.5	4	4.3	4.6	4.5	4.5	4.5	4.5	4	4.5	4.8	4.5	4.3	3.8	3	5	4.5	4.7	4.5	4.5	4.2	3.9	4.2	4	4.8	4.8	5	4.7	4.5	4.6	4	5	4.6	4.5	4.5	4.8	4.5
	5	760	7.9	1.79964	633	4.3	0.0801266	89	13101.6	1658.43	3	4.2	3.2	3.5	4.5	3.8	4.6	3.7	4.1	4.2	4.2	4.1	4.6	3.8	4	4	4.3	3.8	4.2	4.3	4.2	2.5	2.5	4.2	3.3	4.3	4.2	3.5	3.5	3.5	3.6	3.3	3.2	4.2	4.3	3.3	4.3	4.3	4.5
	6	790	6.4	1.29807	401.6	4.5	0.06275	132	11780.3	1840.67	4	3.7	3.9	3.8	3.2	3.5	3.9	3.1	3.5	4	3.9	3.5	2.8	3.6	3.8	3.7	3.8	4	3	3.6	4	3.8	3.8	3.8	3.3	3.7	3.2	3.9	3.4	3.9	3.8	3.8	3.9	3.5	3.6	3.6	3.8	3.8	4.2
	Mean	776.667	7.64167	1.62289	816.633	4.8	0.104719	83	12878.6	1697.1
	SEM	15.1971	0.538174	0.0756318	118.865	0.143427	0.0109039	9.89372	810.583	62.1318
6	1	690	5.55	1.68945	675.6	5.2	0.12173	67	8704.85	1568.44	4.8	5	4.2	4.2	5	4.5	4.5	4.7	4.2	4.5	4.1	5.2	3.5	4.5	4.8	3.9	3.5	3.8	4.6	4.7	4.2	4	4	4.8	4.5	4.5	3.5	4.3	4.5	4.7	4.7	3.3	3.3	4.5	4.2	4.7	4.5	3	4.5
Repeats	2	780	7.1	1.49615	578.2	5	0.0814366	108	12489.1	1759.03	4.2	4.3	4	4.3	3.8	3.9	4.5	4.5	4	4.2	4.3	4.2	4	4.5	4.5	4.5	4.2	3.8	4.2	4.5	4.3	4	4.3	4	4	4.2	4.2	4.2	4.3	4.3	4	4.7	4	4.2	4	4	4.1	4.2	4.2
22 GnRH	3	820	9.95	1.8046	1044.5	4.9	0.104975	84	17905.7	1799.57	3.5	4.5	4.3	4.5	4	4	3.6	4	4.6	4.5	4.5	4.5	4.7	4.3	4	4.8	4.3	4.5	4.3	4.5	4.8	4.5	4.6	4.3	4.2	4.7	4.5	4.5	4.7	4.5	4.6	4.7	4	4.6	4.8	4.8	4.2	4.3	4.2
	4	810	8.15	1.53357	691.8	4.9	0.0848834	78	11012.3	1351.21	4	4.3	4.4	4.7	4.2	4.5	4.2	4	4	4.5	4.6	4.7	4.5	4.2	4.5	4.5	4	4.2	5	4.8	4	4.2	4.6	4	4.8	4.7	4.2	4.5	4.8	4.4	4.5	4.5	4.5	4.5	4.8	4.8	4.2	4.2	4.5
	5	775	7.75	1.66493	1021.7	5.1	0.131832	70	14023.3	1809.46	5	5	5	5	5	4.2	4.7	4.8	4.9	4	5	5	4.7	4.5	4.9	4.8	4.5	5	4.9	5	4.7	4.7	4.5	4.7	4.5	5	4.2	4.5	4	5	5	4.9	4.8	5	5	4.8	4.5	5	4.8
	6	785	8.45	1.74682	825.2	5.1	0.0976568	84	13591.5	1608.47	4.5	4.5	4.3	4.2	4.2	4.5	4	3.8	4.2	4.5	4.2	4.3	4.7	4.6	4.5	4.5	4.4	4.3	4.7	4.7	4.5	4.5	4.2	4.5	4.6	4.5	4.4	4.4	4.2	4.2	4.5	4.3	4	4	4.6	4.7	4.3	4.5	4.5
	Mean	776.667	7.825	1.65592	806.167	5.03333	0.103752	81.8333	12954.5	1649.36
	SEM	17.3891	0.553399	0.0453784	72.8434	0.0457738	0.0075675	5.52613	1172.43	67.0479
												Foll Diam
F value		29.38	27.29	2.593	7.493		2.117		11.571	2.136		1.374
P		0	0.0001	0.043	0		0.09		0	0.086		0.26
Group 1		a	a	a	a		a		a	a		a
Group2		b	b	ab	ab		a		b	a		a
Group3		a	a	ab	a		a		a	a		a
Group4		a	a	ab	a		a		a	a		a
Group5		b	b	ab	b		a		b	a		a
Group6		b	b	b	b		a		b	a		a
[truncated: 12 more columns]

## Sheet: sample 5 15-04-09
Group	Fish	Length (mm)	Weight (kg)	Condition Factor	Gonad Wt. (g)	Gonad sub-sample (g)	G.S.I. (%)	Follicle Count	Fecundity	Relative Fecundity	Follicle Diameters (mm)
											1	2	3	4	5	6	7	8	9	10	11	12	13	14	15	16	17	18	19	20	21	22	23	24	25	26	27	28	29	30	31	32	33	34	35	36	37	38	39
1	1	590	4.2	2.045	610.7	6.7	0.145405	80	7291.94	1736.18	5.3	4.6	5.5	5.3	4.8	5.2	6	5.5	5.2	4.5	4.8	4.8	5.2	5	5	5.1	5	5.2	5.4	5.5	5.2	5.5	5.3	5.3	5.2	5.3	5.5	4.8	5.2	5	5.3	4.6	5.5	4.8	4.8	5.3	5	4.8	4.7
Maiden	2	640	3.7	1.41144	496.3	6.5	0.134135	87	6642.78	1795.35	5.3	5.6	5.5	5.5	5.9	5.2	5.5	5.5	5	5	5.3	5.4	5.5	6	5.8	5.5	5.2	5.8	5	5.5	5.5	5.7	5.7	6	5.5	4.5	5.2	5.3	5.2	5.3	4.9	5.6	5.2	5.2	5.2	5.2	5.5	5.2	5.3
	3	615	3.9	1.67664	458.1	5.4	0.117462	89	7550.17	1935.94	5.2	4.8	4.8	4.5	4.5	4.3	5.2	5.2	5.2	5	5	5	4.5	4.8	5	5	4.8	5	4.9	5	4.6	5	4.7	5.1	4.6	4.9	5.1	5.2	4.8	4.5	4.6	5.1	5	5.1	5	4.8	4.6	5	5
	4	625	3.6	1.47456	588.2	6.1	0.163389	68	6556.98	1821.38	5.8	5.6	5.5	5.8	5.5	5.8	5.2	5.7	5.6	5.3	5.3	5.7	5.6	5	4.7	5.7	5.5	5	5.1	5.2	5.3	5	6.2	5.8	5.5	5.2	5.5	5.3	5.3	5.3	5.3	5.7	5.3	5.2	5.2	5.6	5.5	5.2	5.2
	5	655	3.7	1.31667	568.4	5.1	0.153622	60	6687.06	1807.31	6	5.3	5.5	5.5	4.8	5.5	5.5	5.5	5.3	5.3	5.5	6	5.3	5	5	5.3	5.2	5.2	5.6	5.6	4.5	5.7	5.7	5.2	5.4	5.2	5.5	5.8	5.5	5.5	5.3	6	5	5.7	6	5.5	5.2	5.3	5.5
	6	600	3.65	1.68981	622.6	5.4	0.170575	65	7494.26	2053.22	5.2	5	5.5	5.5	5.3	5.3	5	5.6	4.8	5.2	5	5.2	5.8	5.2	5.7	5.2	5.5	5.6	5.2	5.3	4.7	5	5.5	5.5	5.5	5	5	5.5	5.6	5.1	5	5.3	5.3	5.3	5.3	5.2	5.8	5.6	5.2
	7	675	4.5	1.46319	671.2	6.4	0.149156	80	8390	1864.44	5	4.8	4.9	5.2	5	5.2	5.2	5	5.5	5.4	5.5	5.6	6	5.2	5.5	5.7	5.8	5.6	5.9	5.7	5.2	5.5	5	5.1	5	5.3	5	4.7	5.2	5.3	5.5	5.5	5.8	5.6	5.5	5.6	5.2	4.3	5
	Mean	628.571	3.89286	1.58247	573.643	5.94286	0.147678	75.5714	7230.46	1859.12
	SEM	11.4286	0.127442	0.0925944	27.9706	0.239898	0.00674403	4.25864	249.492	39.9092
2	1	785	7.65	1.58144	665.9	4.8	0.0870458	86	11930.7	1559.57	4.6	4.3	5	4.2	4.8	5	4.7	5.1	5	4.2	4.8	5	4.8	4.6	4.7	4.9	4.7	4.3	4.5	4.8	4.9	4.8	5	4.5	4.7	4.5	4.8	5	4.5	4.8	4.6	4.7	5.2	4.8	4.2	5	5.1	5.3	5
Repeat	2	800	7.45	1.45508	1020	7.4	0.136913	65	8959.46	1202.61	6.5	6	6	5.8	6.2	5.7	5.2	5.5	6.2	6.2	6	6.5	6.4	6	6.2	6.2	6.2	6.2	6.2	6.3	6.3	6.6	6.5	6.5	6.2	6.5	6.2	6.2	5.8	6	6.2	6.2	5.2	6	5.8	6.8	6	6.2	6.3
	3	790	8.75	1.77471	967.4	5.6	0.11056	89	15374.8	1757.11	4.9	4.5	4.9	4.7	4.5	5.2	5	5.3	5	5.1	5.2	5.3	5.2	5.2	4.8	5.3	4.7	4.8	5.2	4.5	4.9	5	5	4.8	5.2	5	5	5	4.7	4.7	4.5	4.9	5.2	5	5.2	5	5.2	5.2	4.8
	4	730	6.8	1.748	1045.6	5.2	0.153765	53	10657.1	1567.22	5.7	5.7	6.1	6	5.8	5.8	5.5	5.9	5.8	5.2	6	5.2	6	6	5.7	5.5	5.8	5.8	5.3	5.5	6	5.5	6	6.1	6	6	5.8	5.7	5.8	5.6	5.8	5.5	5.8	6	5.3	6	6.2	5.2	5.7
	5	805	7.75	1.48564	944.3	5.8	0.121845	74	12048	1554.58	5.6	5.3	5.2	5.2	5.2	5.3	5.2	5.2	5.5	5.5	5.5	5.8	5.8	5.3	5.3	5.4	5.5	5.5	5.7	5.4	5.5	5.5	5.6	5.7	5.7	5.5	5.1	5.2	5.3	5.3	5.8	5.5	5.8	5.9	5.2	5.5	5.6	5.3	5.5
	6	710	5.65	1.5786	763.1	5.8	0.135062	67	8815.12	1560.2	6	4.3	3.5	6.2	5.9	4.5	4.3	5.2	5.5	5.9	6	4.8	5.2	5.6	6	5.8	5.8	5	5	5.8	5.2	5.6	6	5.6	6.1	5.6	5.9	6	5.7	6	5.7	5.9	5.2	5.8	5.9	5.2	5.5	5.5	4.5
	7	780	7.95	1.67526	1158.3	5.9	0.145698	61	11975.6	1506.37	5.8	5.5	5.8	5.6	6	5.3	6	5.2	5.9	5.5	5.3	5.5	5.2	5.3	5.5	4.5	5.3	5.9	5.3	5	5.7	5.7	5.2	5.3	5.5	4.8	5.2	5.5	5.3	5.8	5.5	5.3	5.2	5.2	5.4	5.1	5.5	5.6	5.5
	Mean	771.429	7.42857	1.6141	937.8	5.78571	0.12727	70.7143	11394.4	1529.67
	SEM	13.8321	0.369339	0.0466956	64.0621	0.307392	0.00862155	4.96039	845.451	62.3158
3	1	750	6.25	1.48148	878.6	5.4	0.140576	73	11877.4	1900.38	4.8	5	4.5	5.3	4.7	5	5.8	4.6	5.2	4.9	5.2	4.5	4.7	4.7	4.5	5.6	5.6	4.6	5.3	4.8	5.2	4.2	5	5.2	4.5	5.2	5.3	4.9	4.3	5.3	4.3	4.9	4.9	4.9	5.2	4.8	4.8	5.3	4.6
Maiden	2	675	4.7	1.52822	607.6	5.9	0.129277	80	8238.64	1752.9	5	5	5.2	4.9	4.8	5	5.3	5.3	5.1	4.8	4.8	5.1	5.2	4.9	4.8	4.8	5	5	5	5.1	5	5	4.8	5	5	4.8	4.9	4.7	5.3	5	4.8	4.7	5	5	5.2	5.2	5.2	4.5	4.7
22 blank	3	600	3.3	1.52778	392.7	5.1	0.119	83	6391	1936.67	5	4.2	5	4.3	4.7	4.5	4.5	4.1	4.8	4.2	4.7	4.9	4.2	4.9	4.5	4.5	4.5	4.7	4.7	4.7	4.7	4.5	4.7	5	5.1	5	4.8	4.2	5	5.5	4.5	4.7	4.8	4.6	4.7	3.5	4.2	4.8	5.1
	4	615	3.1	1.33271	219.9	6.5	0.0709355	146	4939.29	1593.32	4.5	3.5	3.5	4.1	4.3	4.1	3.7	3.7	4.3	4.3	4.5	4.2	4.2	4	3.8	4.1	4	3.6	4.2	4.1	3.5	4.1	4.3	3.9	4.2	4.3	4.5	4	4.2	4.2	4.4	4.4	4.5	4.3	3.9	4.3	4.7	4.1	4.3
	5	660	4.4	1.53046	333.6	5.3	0.0758182	75	4720.75	1072.9	4	4.5	4	4.7	4.5	4.3	4.5	4.5	4.8	4.8	4.8	5	4	4.1	4.2	4	4.7	4.2	4.3	4.7	4.3	4.2	4.5	4.6	4.5	4.5	4.5	4.5	4.8	4.5	4	4.6	4.6	4.7	4.7	4.5	4.6	4.5	4.7
	6	555	2.65	1.55013	386.9	6.5	0.146	94	5595.17	2111.38	5	4.7	4.7	4.4	4.8	4.8	4.5	4.6	5	3.7	4.7	4.9	5.2	5	5	4.6	5	4.5	4.7	4.8	4.5	4.8	4.3	4.7	5	4.8	5	5.1	4.5	4.8	4.6	5	4.8	4.9	4.9	4.7	5.1	4.7	4.7
	7	640	3.55	1.35422	434.7	5.5	0.122451	115	9089.18	2560.33	4.2	4.5	4.7	4.3	3.9	3.6	4.2	4.7	4.5	4	4.8	3.6	4.5	3.4	4.5	4.7	4.2	4.9	4	4.3	3.8	4.3	4.1	4.3	4	4.1	4.7	4.5	4.4	3.7	3.7	3.9	4.8	4	4.1	4	4	4	3.8
	Mean	642.143	3.99286	1.47214	464.857	5.74286	0.114865	95.1429	7264.49	1846.84
	SEM	23.4738	0.463864	0.034211	81.7931	0.215867	0.0113045	10.0651	987.829	173.347
4	1	785	5.3	1.09564	722.2	6.4	0.136264	108	12187.1	2299.46	4.5	4.5	5	4.9	4.5	4.7	4.7	4.7	4.7	4.9	4.5	4.4	4.3	3.9	4.8	3.6	4.7	4.2	4.2	4.2	4.2	5	4.7	4.5	4.7	4.3	4.2	4.7	3.6	4.5	4.7	4.2	4.8	5.2	5	4.8	5.2	5	4.8
Maiden	2	635	3.45	1.3474	517.3	5.7	0.149942	91	8258.65	2393.81	5.1	5.1	5	4.8	4.7	4	4.7	5	4.5	4.7	5	4	4.7	5.2	4.3	5	5	4.8	4.6	5.2	5.2	4.2	4.7	4.2	5.2	5.1	4.2	4.6	4.3	3.6	5	4.9	4.3	5	5.1	4.8	5	4.8	5
22 GnRH	3	655	3.9	1.38784	490.1	6.6	0.125667	113	8391.11	2151.57	4.9	4.7	4.7	4.7	4.9	4.7	4.7	5.1	4.9	5	4.2	4.8	4.3	4.7	5	4.6	4.5	5.1	4.8	5	4.7	4.7	5	4.7	4.3	4.3	4.7	4.7	5.2	4.7	4.9	4.7	4.1	4.7	4.8	4.7	4.3	4	4.7
	4	620	3.65	1.5315	463.7	7	0.127041	127	8412.84	2304.89	4.9	4.7	4.9	4.8	4.7	5	5	4.5	5.2	4.5	4.4	4.6	4.9	4.9	5.2	5.1	5	4.9	4.9	4.6	5.2	4.8	4.5	4.7	4.8	4.8	5.2	4.7	4.3	4.7	4.8	4.9	5.3	4.8	4.8	5.3	4.7	5.2	5
	5	740	6.3	1.5547	777.2	6.9	0.123365	99	11151.1	1770.02	5	4.7	4.5	4.9	4.8	4.5	4.8	5.3	5	4.6	4.8	5	4.7	5	4.5	4.5	4.6	4.7	4.9	5	5	4.8	5.2	5.1	5	4.8	4.8	4.6	5	4.5	4.5	5.3	4.9	4.5	4.3	4.7	5	4.6	4.8
	6	650	4.25	1.54756	531.6	5.6	0.125082	86	8163.86	1920.91	4.5	4.9	4.5	4.5	4.8	5	4.5	4.2	4.7	5	4.2	5	4.3	4.8	4.8	4.6	5	4.7	4.8	4.9	4.6	5	4.7	4.8	5	4.6	4.7	4.6	4.6	4.3	4.7	4.9	4.2	3.9	4.2	4.6	5	4.9	4.8
	7	615	3.45	1.48318	277.5	5	0.0804348	84	4662	1351.3	4.3	4.5	4.7	4.8	4.9	4.8	4.8	5.1	4.2	4.2	4.9	5	4.9	4.9	4.8	4.9	4.7	5	5.1	4.8	4.7	5	4.8	4.7	4.7	5	5	5	4.5	4.2	5	4.7	4.9	4.7	5	5	4.7	4.7	4.7
	Mean	671.429	4.32857	1.42112	539.943	6.17143	0.123971	101.143	8746.67	2027.42
	SEM	24.6334	0.408956	0.0621723	63.1069	0.283443	0.00806952	5.9499	914.414	141.032
5	1	810	6.9	1.29836	829.3	6.1	0.120188	104	14138.9	2049.11	4.6	4.6	5	4.5	5	3.8	4.8	4.3	5	4.6	4.7	5	5	4.7	4.8	4.6	4.8	4.9	4.8	4.2	3.8	4.7	4.3	4.2	4.3	4.2	5.2	4.5	4.2	4.5	4.3	4.7	4.6	4.7	4.3	4.6	4.5	5	4.8
Repeat	2	650	3.5	1.27447	422.6	7.5	0.120743	90	5071.2	1448.91	5	5	5.2	5.5	5.8	5.2	5.3	5.2	5.2	5	5	5	5.4	5.7	5.5	5	5.2	5.1	5.2	5.3	5.5	5.2	5.3	5.2	5.2	5.5	5.5	5.2	5.6	5.2	5.2	5.6	5.4	5.2	5.3	5	5.5	5.5	5.2
blank	3	710	5	1.397	727	6.5	0.1454	92	10289.8	2057.97	5.2	5.2	5	4.5	5.2	5.5	5.5	5.2	5.5	5	5.4	5	5	5.5	5	5.2	5.8	4.9	5.3	5.5	5	5	5.2	5.2	4.7	5	5.2	5.2	5.5	5.2	5.3	5.3	5.2	5	5.3	5	5.5	5	5.5
	4	780	6.5	1.36971	903.2	5.9	0.138954	80	12246.8	1884.12	5.2	5	5.3	5	4.8	5.5	4.7	4.5	5.2	5.3	4.9	4.7	5	5	5.3	5.4	5	5.3	4.8	5	5.5	5.2	5.6	4.5	5.3	5.2	5.6	5.3	5.4	4.9	5	5.2	5.7	5.2	5	4.8	5.2	5	5.2
	5	735	5.65	1.42294	647.3	7.9	0.114566	98	8029.8	1421.2	5	5.2	4.5	5	5.2	5.3	5	5	5	5.2	4.8	4.5	5	4.6	4.8	5	5.1	5	5.3	5.1	4.8	5	4.8	4.9	5	5.2	4.9	4.9	5	4.6	4.4	5.2	4.7	4.8	5	4.5	5.2	4.8	5
	6	805	7.9	1.5144	515.9	5.7	0.0653038	138	12490.2	1581.04	4.1	4	4	4.2	3.9	3.9	3.5	3.8	3.5	4	4	4	4.2	3.8	3.8	4.2	3.7	3.7	3.9	4.2	4.2	4.3	4	3.1	4.2	3.7	3.5	3.7	4.2	4.2	3.6	4.1	4	3.8	3.7	3.7	3.8	3.8	3.8
	Mean	748.333	5.90833	1.37948	674.217	6.6	0.117526	100.333	10377.8	1740.39
	SEM	23.5028	0.585347	0.0329945	69.3583	0.340588	0.0106764	7.61077	1262.45	110.719
6	1	830	8.8	1.53903	941	6.6	0.106932	104	14827.9	1684.99	4.7	4.7	4.7	4.5	4.5	4.5	4.6	4.5	4.5	4.6	4.7	4.8	4.2	4.7	4.5	4.7	4.3	4.5	4.5	4.7	4.2	4.5	4.7	4.3	4.7	4.7	4.7	4.6	4.7	4.3	4.5	4.7	4.5	4.5	4.6	4.8	4.9	4.7	4.7
Repeats	2	750	5.9	1.39852	693.7	6	0.117576	90	10405.5	1763.64	5	5	4	4.7	4.8	5	5	5.1	4.8	5	4.7	4.9	4.8	5	5	4.7	5	4.8	5	4.7	5	4.9	4.8	5	4.3	4.8	4.3	4.5	4.8	4.7	4.8	4	4.8	5.2	5.2	4.9	4.5	4.8	5
22 GnRH	3	775	7.8	1.67567	802.2	6.4	0.102846	120	15041.2	1928.37	4.7	4.3	4.5	4.5	4.5	4.8	3.8	3.6	4.9	4.5	4.7	4.7	3.5	4.5	4.7	4.5	4.5	4.7	4.5	4.3	4.5	4.3	3.8	4.5	4.5	4.7	4.5	4.5	4.4	4.5	3.6	4.8	4.8	3.9	4.7	4.8	4.7	5	5
	4	810	8.2	1.54297	909.7	6.7	0.110939	108	14663.8	1788.27	4.7	4	4.6	4.6	5	4.8	4.3	4.4	4.5	3.2	4.3	4.3	4.3	3.8	4	3.6	4.8	4.6	4	4.4	5	4.6	4.5	4.8	4.7	4.7	4.5	4.5	4.8	4.8	4.7	4.5	4.8	4.8	4.7	4.5	4.7	4.9	4.7
	5	710	6.75	1.88594	501.1	6.3	0.074237	148	11771.9	1743.98	4.5	4	4.2	4	4.3	4.3	3.2	4.1	4	4	3.5	3.8	4	4	4.2	4.3	4.1	4	4	4.3	4.2	4.2	4	4.2	4.2	4.2	4.2	4.4	4.1	4.1	4.1	4	4.3	4.2	4	3.6	4.1	4	4
	6	780	6.9	1.454	669.4	6.6	0.0970145	88	8925.33	1293.53	4.8	4.2	4	3.5	3	5	3	2	4.6	4.3	4.5	4.5	4	3.8	4.8	4.5	4.4	4	4.5	4	4.8	4.5	4.7	4.3	3	4.8	4.2	4.2	4.7	3.5	4.8	3.2	4.2	3.8	4.5	4.1	4.3	4.5	3.7
	Mean	775.833	7.39167	1.58269	752.85	6.43333	0.101591	109.667	12605.9	1700.46
	SEM	16.143	0.402921	0.0664554	62.3993	0.09759	0.00571264	8.39614	988.319	81.3058
												Foll Diam
F value
P
Group 1		a	a	a	a		a		a	a		a
Group2		b	b	ab	ab		a		b	a		a
Group3		a	a	ab	a		a		a	a		a
Group4		a	a	ab	a		a		a	a		a
Group5		b	b	ab	b		a		b	a		a
Group6		b	b	b	b		a		b	a		a
[truncated: 12 more columns]

## Sheet: Tags-ovulations
								Group Cum. % Ovulation
	Tag #	M or R	B or G	Group		Date	Day	1	2	3	4	5	6		1	2	3	4	5	6
						2009-05-08	0	0	0	0	0	0	0		0	0	0	0	0	0
	655210	M	-	1	2009-05-13	2009-05-12	4	0.142857	0	0	0	0	0		14.2857	0	0	0	0	0
	648882	M	-	1	2009-05-20	2009-05-15	7	0.285714	0	0	0	0	0		28.5714	0	0	0	0	0
	631666	M	-	1	2009-05-27	2009-05-19	11	0.285714	0	0	0	0	0		28.5714	0	0	0	0	0
	627368	M	-	1	2009-06-03	2009-05-22	14	0.285714	0	0	0	0	0		28.5714	0	0	0	0	0
	622497	M	-	1	2009-06-10	2009-05-26	18	0.714286	0	0.5	0.142857	0	0		71.4286	0	50	14.2857	0	0
	628598	M	G	4	2009-06-17	2009-05-29	21	0.714286	0	0.6	0.142857	0	0		71.4286	0	60	14.2857	0	0
	665572	M	B	3	2009-06-24	2009-06-02	25	0.857143	0.166667	0.833333	0.571429	0.666667	0		85.7143	16.6667	83.3333	57.1429	66.6667	0
	626835	M	B	3	2009-07-01	2009-06-05	28	0.857143	0.666667	0.833333	0.571429	0.833333	0		85.7143	66.6667	83.3333	57.1429	83.3333	0
	641513	M	B	3		2009-06-10	33	1	0.666667	1	0.714286	1	0.166667		100	66.6667	100	71.4286	100	16.6667
	662201	R	-	2		2009-06-12	35		0.666667		1		0.166667			66.6667		100		16.6667
	664604	M	-	1		2009-06-16	39		0.833333				0.166667			83.3333				16.6667
	654400	M	G	4		2009-06-19	42		0.833333				0.166667			83.3333				16.6667
	616938	M	G	4		2009-06-23	46		0.833333				0.5			83.3333				50
	619854	M	G	4		2009-06-26	49		0.833333				0.5			83.3333				50
	663001	R	B	5		2009-06-30	53		1				0.666667			100				66.6667
	622425	M	B	3		2009-07-03	56						0.666667							66.6667
	362664	M	B	3		2009-07-07	60						0.666667							66.6667
	399213	R	B	5
	389358	R	B	5
	418358	R	B	5
	389807	R	B	5
	432809	R	-	2
	393055	R	-	2
	629865	R	-	2
	639102	M	-	1
	645213	M	G	4
	661694	R	G	6
	630189	M	B	3
	658134	R	B	5
	661560	M	G	4
	639394	M	G	4
	634332	R	-	2
	623746	R	G	6
	418954	R	G	6

## Sheet: Ovulations
Fish Tag#	Ovulation Date	Spawn Date	M or R	B or G	Treat	Length (mm)	CF	Wt. Pre-Strip (kg)	Wt. Prost-Strip (kg)	GSI (%)	Wt. 500 eggs (g)	Total wt. eggs (g)	Fecundity	Relative Fecundity	Fert. Eggs	Unfert. Eggs	Fertility (%)	Dead Eggs	Eyed (%)	1	2	3	4	5	6	7	8	9	10	11	12	13	14	15	16	17	18	19	20	21	22	23	24	25	26	27	28	29	30
655210	2009-05-12	2009-05-15	M	-	1	650	1.45653	4	3.2	0.2	56.5	749.7	6634.51	1658.63	149	2	0.986755	3	0.994	6	5.6	5.8	5.8	5.9	6	6	5.7	5.5	6	6	5.7	5.8	5.6	5.7	5.7	5.1	5.7	5.8	6	5.8	5.6	5.8	5.9	6.2	5.7	5.8	5.7	5.9	5.8
648882	2009-05-15	2009-05-19	M	-	1	680	1.49476	4.7	3.42	0.27234	64	1203.1	9399.22	1999.83	76	5	0.938272	9	0.982	6.1	6	5.8	5.8	5.9	6.6	6.2	6.1	5.8	6	6.2	5.9	6.2	6.1	6	6	6	6.2	6.1	6.1	6	5.9	6	5.8	6	6	6	6.2	6	6.2
631666	2009-05-26	2009-05-28	M	-	1	675	1.54123	4.74	3.72	0.21519	70.9	1048.2	7392.1	1559.52	89	8	0.917526	133	0.734	6.2	6.4	6.3	6.4	6.2	6	5.9	5.8	6.1	6.2	6.1	5.8	6.2	6.2	6.4	6.3	5.9	5.9	6.1	6.3	6	5.9	5.8	6.1	6	5.5	6	6.1	5.9	5.8
627368	2009-05-26	2009-05-28	M	-	1	670	1.36985	4.12	3.24	0.213592	68.9	842.6	6114.66	1484.14	105	7	0.9375	35	0.93	5.8	5.8	6	6.2	5.8	6.2	6.2	5.9	5.9	6	5.9	5.9	5.5	6	5.8	6.3	6.3	5.9	6.2	6.2	6	6	6	5.9	5.9	6.1	6.1	6.2	6.2	5.8
622497	2009-05-26	2009-05-28	M	-	1	725	1.33306	5.08	4.1	0.192913	68.3	925.8	6777.45	1334.14	108	5	0.955752	22	0.956	5.7	5.6	5.9	5.9	5.6	6.1	5.8	5.8	5.9	6	5.9	6.2	6	6	5.8	5.2	5.6	5.7	5.8	5.8	6	5.8	6	6.3	6.2	6	6.4	6	5.7	6.1
664604	2009-06-02	2009-06-05	M	-	1	670	1.46295	4.4	3.38	0.231818	68.6	1011.7	7373.91	1675.89	100	5	0.952381	Estimated	0.85	6.3	5.8	5.9	5.9	5.9	6	6.2	6	6	6.3	6.1	6	6	6.1	6	6	6.2	6.1	6.1	6.2	6	6.2	6	5.9	6.3	6	6.2	6.4	6.2	6.2
639102	2009-06-10	2009-06-12	M	-	1	670	1.51614	4.56	3.28	0.280702	70.3	1249.7	8888.34	1949.2	75	20	0.789474	54	0.892	6.1	6.2	6.1	6	6	6	6.1	6.2	6	6	6.3	5.9	6.1	6	5.7	6.2	5.9	6	6.3	5.9	6.5	6.3	5.9	5.8	6.1	6.2	5.9	5.7	6	6.1
662201	2009-06-02	2009-06-05	R	-	2	735	1.54634	6.14	4.64	0.2443	79.1	1353.1	8553.1	1393.01	86	20	0.811321	Estimated	0.85	6.4	6.7	6.4	6.2	6.7	6.4	6.2	6.7	6.9	6.3	6.6	6.5	6.4	6.6	6.6	6.8	6.2	6.5	6.7	6.5	6.6	6.5	6.4	6.4	6.9	6.6	6.3	6.8	6.6	6.7
432809	2009-06-05	2009-06-10	R	-	2	805	1.38788	7.24	5.34	0.262431	66	1604.9	12158.3	1679.33	94	15	0.862385	51	0.898	6.5	6.2	5.8	5.9	6	6.1	6.5	6.4	6.4	6.3	6	6.3	6.2	6.3	6	6.4	6	5.9	6.1	6	6	6.2	6.2	6.3	6.8	6.2	6	6.4	6.4	6.4
393055	2009-06-05	2009-06-10	R	-	2	750	1.60711	6.78	5.42	0.20059	83.7	1315.2	7856.63	1158.8	76	29	0.72381	135	0.73	6.6	6.7	6.8	6.9	6.5	6.4	6.9	6.7	6.5	6.7	7.1	7	6.5	6.7	7.1	7.1	6.4	6.9	6.8	6.5	6.7	6.4	6.6	6.6	6.6	6.9	7.1	6.3	6.7	6.8
629865	2009-06-05	2009-06-10	R	-	2	780	1.50879	7.16	5.76	0.195531	79.2	1245.2	7861.11	1097.92	94	15	0.862385	73	0.854	6.4	6.6	6.9	6.6	6.6	6.7	6.7	6.6	6.5	6.6	5.8	6.6	6.3	5.5	6.3	6.6	6.7	6.7	6.6	6.6	6.2	6.9	6.5	6.5	6.6	7	6.2	5.5	6.2	6.1
634332	2009-06-16	2009-06-19	R	-	2	675	1.46319	4.5	3.56	0.208889	81.3	856	5264.45	1169.88	85	22	0.794393	108	0.784	6.7	6.7	6.6	6.7	6.6	7	6.4	6.8	6.4	6.3	6.8	6.8	6.6	6.7	6.7	6.7	6.7	6.2	6.7	6.6	6.8	6.7	6.9	6.6	6.8	6.8	6.8	6.7	6.8	6.8
361992	2009-06-30	2009-07-03	R	-	2	680	1.54564	4.86	3.7	0.238683	80.8	1082.9	6701.11	1378.83	87	6	0.935484	40	0.92	6.6	6.6	6.6	6.2	6.4	6.7	6.4	6.5	6.5	6.6	6.7	6.7	6.5	6.5	6.7	6.3	6.1	6.2	6.7	6.3	6.5	6.8	6.5	6.5	6.4	6.6	6.6	6.7	6.5	6.4
665572	2009-05-26	2009-05-28	M	B	3	675	1.40466	4.32	3.38	0.217593	53	925.5	8731.13	2021.1	137	22	0.861635	106	0.788	5.2	5.6	5.6	5.4	5.5	5.6	5.5	5.4	5.5	5.4	5.6	5.6	5.6	5.7	5.2	5.4	5.7	5.5	5.5	5.2	5.1	5.3	5.5	5.3	5.7	5.4	5.4	5.1	4.9	5.3
626835	2009-05-26	2009-05-28	M	B	3	680	1.44387	4.54	3.58	0.211454	63.5	946	7448.82	1640.71	111	20	0.847328	146	0.708	5.8	5.7	5.7	5.6	5.8	5.8	5.5	5.7	5.5	5.6	5.9	5.8	5.7	5.7	5.6	5.9	5.7	5.9	5.8	5.9	5.9	5.6	5.5	6	5.9	5.9	5.8	6	5.7	5.8
641513	2009-05-26	2009-05-28	M	B	3	700	1.42274	4.88	3.82	0.217213	57.4	1059.8	9231.71	1891.74	116	26	0.816901	162	0.676	5.5	5.4	5.5	5.5	5.8	5.5	5.7	5.7	5.9	5.5	5.6	5.6	5.5	5.2	5.3	5.7	5.4	5.6	5.5	5.7	5.8	5.8	4.5	4.7	5.6	5.8	5.3	4.3	5.6	5.7
622425	2009-06-02	2009-06-05	M	B	3	675	1.53473	4.72	3.7	0.216102	48.1	1019	10592.5	2244.18	75	88	0.460123	Estimated	0.25	5.5	5.4	5.3	5.6	5.6	5.5	5.5	5.4	5.5	5.6	5.5	5.3	5.5	5.5	5.2	5.3	5.6	5.3	5.4	5.3	5.3	5.4	5.4	5.6	5.5	5.2	5.4	5.4	5.5	5.5
632664	2009-06-02	2009-06-05	M	B	3	665	1.44179	4.24	3.32	0.216981	50.2	921.8	9181.27	2165.4	63	65	0.492188	Estimated	0.4	5.4	6	5.7	5.4	5.7	5.8	5.6	5.5	5.4	5	5.7	6	5.8	5.2	5.8	5.1	5.3	5.6	5.7	5.3	5.4	5.5	5.7	5.8	5.7	5.7	5.6	5.7	5.4	5.4
630189	2009-06-10	2009-06-12	M	B	3	680	1.42479	4.48	3.56	0.205357	53.8	951.9	8846.65	1974.7	111	8	0.932773	191	0.618	5.2	5.7	5.5	5.6	5.6	4.9	5.7	5.7	5.4	5.5	5.6	5.9	5.5	5.9	5.6	5.5	5.6	5.7	5.5	5.6	5.8	5.7	5.6	5.5	5.5	5.8	5.4	5.6	5.8	6
628598	2009-05-26	2009-05-28	M	G	4	655	1.45902	4.1	3.14	0.234146	63.3	991.9	7834.91	1910.95	96	17	0.849558	156	0.688	5.9	5.9	5.6	5.8	5.7	5.7	5.8	5.6	5.9	5.7	5.9	5.8	6.1	5.9	5.6	6	5.7	5.9	5.6	5.7	6	5.8	5.8	5.8	6	5.7	5.7	5.5	5.4	5.5
654400	2009-06-02	2009-06-05	M	G	4	590	1.38281	2.84	2.36	0.169014	50.7	426.5	4206.11	1481.03	98	34	0.742424	Estimated	0.8	5.6	5.3	6	5.6	5.6	5.6	5.6	5.5	5.6	5.2	5.6	5.7	5.3	5.6	5.6	5.9	5.5	5.8	5.3	5.6	5.8	5.8	5.5	5.7	5.5	5.7	5.6	5.6	5.5	5.5
616938	2009-06-02	2009-06-05	M	G	4	705	1.52967	5.36	4.46	0.16791	51.9	883.6	8512.52	1588.16	77	42	0.647059	Estimated	0.3	5.3	5.3	5.6	6.2	5.2	5.3	5.4	5.3	5.4	6	5.7	6	5.2	5.8	5.7	5.5	5.3	5.3	5.2	5.3	5.4	5	6.2	5.1	5.3	5.3	5	5.4	5.2	5.8
619854	2009-06-02	2009-06-05	M	G	4	645	1.43104	3.84	3.12	0.1875	48.7	713.7	7327.52	1908.21	107	41	0.722973	Estimated	0.5	5.6	5.7	6	5.9	5.9	5.2	5.4	5.2	5.6	5.8	5.3	5.4	5.5	5.3	5.9	5.3	5.6	5.3	5.1	5.3	5.8	5.6	5.2	5.2	4.9	5.1	4.9	5.3	5.6	5.6
645213	2009-06-10	2009-06-12	M	G	4	660	1.34263	3.86	3.5	0.0932642	69.4	351.2	2530.26	655.508	55	25	0.6875	113	0.774	6.1	6.4	6.1	6.1	5.9	6.3	6.2	6.3	6.1	6.1	6.2	6.3	6.3	6.1	5.4	6.5	6.2	6.3	6.3	6.1	5.8	6.1	6.3	6.1	6.6	6.5	5.5	6.2	6.5	5.8
661560	2009-06-12	2009-06-16	M	G	4	650	1.60218	4.4	3.54	0.195455	51.4	798.8	7770.43	1766.01	72	45	0.615385	253	0.494	6.3	5.3	5.7	5.3	5.1	5.4	5.2	5.1	5.9	5.5	6.2	6.1	5.2	5.7	6.2	5.2	5.5	6.1	6	5.3	5.3	6.1	5.3	5.2	5.1	5.1	5.3	5.4	5.2	5.8
639394	2009-06-12	2009-06-16	M	G	4	630	1.53571	3.84	3.08	0.197917	42.1	653.8	7764.85	2022.1	44	97	0.312057	411	0.178	4.8	5.8	5.7	5.2	4.7	5.8	5.9	4.6	5.1	5.7	4.8	4.2	5.8	4.6	5.2	4.9	4.7	5.9	5.7	5.3	4.8	6	4.9	5.9	4.7	4.8	5.9	4.9	5.3	4.5
663001	2009-06-02	2009-06-05	R	B	5	765	1.56356	7	5.56	0.205714	57.6	1385.6	12027.8	1718.25	99	49	0.668919	223	0.554	6	5.7	5.7	6.1	6	5.9	6	5.3	5.8	5.7	5.8	5.6	5.9	6	5.7	5.7	5.8	5.8	6	5.8	6.1	6.1	5.4	6.2	6	5.2	5.7	5.6	5.7	5.6
399213	2009-06-02	2009-06-05	R	B	5	775	1.62411	7.56	5.94	0.214286	59.2	1598.9	13504.2	1786.27	89	49	0.644928	Estimated	0.65	5.2	5.7	5.7	5.7	6.1	5.5	5.5	5.6	5.8	5.9	6.1	5.5	6.2	6	5.8	6	5.7	6	5.3	5.7	5.7	5.6	5.8	5.1	5.2	5.8	5.3	5.8	5.3	5.5
389358	2009-06-02	2009-06-05	R	B	5	805	1.35337	7.06	5.38	0.23796	69.8	1599.4	11457	1622.81	67	32	0.676768	Estimated	0.8	6.3	6.3	6.2	6.2	6.4	6.4	6.4	6.4	6.1	6.2	6.3	6.3	6.7	6.1	6.3	6.4	6.1	6.5	5.9	6.3	6.3	6.1	6.3	6.3	6.7	6.1	6.1	6.4	6.1	6.3
418358	2009-06-02	2009-06-05	R	B	5	795	1.45683	7.32	5.86	0.199454	52.9	1405.6	13285.4	1814.95	86	37	0.699187	209	0.582	5	5.5	5.8	5.5	5.7	5.9	5.8	5.5	5.7	5.4	6	5.7	5.5	5.6	5.8	5.9	5.8	6	4.9	5.6	5.6	5.8	5.6	5.9	6	6.2	5.7	5.6	5.8	5.7
389807	2009-06-05	2009-06-10	R	B	5	650	1.84251	5.06	3.98	0.213439	60.2	1039.9	8637.04	1706.93	86	47	0.646617	160	0.68	5.9	5.8	6.4	6.4	6.5	6.3	5.8	6.3	6.2	5.6	6.3	6.5	6.2	6.5	5.3	6.7	6.2	6.3	5.7	6.2	6.2	6.2	5.8	5.7	5.4	6.3	6.2	5.8	6	6.2
658134	2009-06-10	2009-06-12	R	B	5	645	1.46085	3.92	3.26	0.168367	49.5	659	6656.57	1698.1	109	21	0.838462	115	0.77	5.5	5.3	5.5	5.5	5.7	5.2	5.9	5.4	5	5.8	5.3	5.3	5.4	5.1	5.5	5.6	5.5	5.8	5.8	5.5	5.1	5.6	5.5	5.5	5.6	5.8	5.4	5.8	5.7	5.1
661694	2009-06-10	2009-06-12	R	G	6	710	1.46405	5.24	4.1	0.217557	57.5	1169.6	10170.4	1940.92	33	82	0.286957	340	0.32	5.9	5.7	5.6	5.5	5.7	5.8	5.6	5.8	5.9	5.6	5.2	5.6	5.9	5.8	5.4	5.4	5.9	6	5.3	5.8	5.6	5.8	5.2	5.5	5.9	5.9	5.4	5.9	5.4	6
623746	2009-06-23	2009-06-26	R	G	6	770	1.26606	5.78	4.52	0.217993	58.2	1184.2	10173.5	1760.13	94	10	0.903846	46	0.908	6.1	5.9	5.9	5.9	6	6	5.7	5.7	5.3	5.9	6	5.9	5.9	5.8	5.8	5.8	5.6	5.9	5.6	5.6	5.9	5.6	6.1	5.8	5.9	5.9	5.8	5.8	5.9	5.8
418954	2009-06-23	2009-06-26	R	G	6	760	1.40782	6.18	5	0.190939	60.4	1008.1	8345.2	1350.36	40	61	0.39604	310	0.38	5.6	5.7	5.8	5.9	5.9	5.9	5.4	5.3	5.5	5.9	5.7	5.6	6.1	5.4	5.7	5.6	6.1	5.6	5.8	5.3	6	5.5	5.6	5.7	5.8	5.8	5.3	5.9	5.6	5.8
649019	2009-06-30	2009-07-03	R	G	6	790	1.54146	7.6	5.78	0.239474	60	1847.2	15393.3	2025.44	71	63	0.529851	103	0.794	6	5.7	6.1	5.9	5.6	5.9	5.9	5.3	5.3	5.7	6	5.8	6	5.9	6.1	5.7	5.5	5.8	6.2	5.3	5.7	5.6	6.2	5.4	6.3	5.8	5.7	6	5.9	5.6
655265	???		R	G	6	840	1.21815	7.22	5.36	0.257618	64.6	1815	14048	1945.7
[truncated: 22 more columns]

## Sheet: Fec-Fert
Fish Tag#	Treat	Length (mm)		CF		Wt. Pre-Strip (kg)		GSI		Fecundity		Relative Fecundity		Fertility		Eyed		Mean egg Diam.		Vol		A-Sin GSI		A-Sin Fert		A-Sin Eyed
655210	1	650	677.143	1.45653	1.4535	4	4.51429	0.2	22.8941	6634.51	7511.46	1658.63	1665.91	0.986755	93.4004	0.994	92.3366	5.748	5.97909	99.4772	112.081	26.5651	28.586	83.3914	75.114	85.5574	73.929
648882	1	680	8.71897	1.49476	0.0288364	4.7	0.141469	0.27234	26.1221	9399.22	456.473	1999.83	90.8082	0.938272	97.5296	0.982	98.2398	6.04	0.0456942	115.421	2.51276	31.4573	30.737	75.6141	80.957	82.2897	82.376
631666	1	675		1.54123		4.74		0.21519	19.8173	7392.1		1559.52		0.917526	87.4732	0.734	82.7779	6.06		116.571		27.6381	26.434	73.3106	69.272	58.9523	65.481
627368	1	670		1.36985		4.12		0.213592		6114.66		1484.14		0.9375		0.93		5.998		113.03		27.5266		75.5225		74.6583
622497	1	725		1.33306		5.08		0.192913		6777.45		1334.14		0.955752		0.956		5.88163		106.578		26.0541		77.857		77.8916
664604	1	670		1.46295		4.4		0.231818		7373.91		1675.89		0.952381		0.85		6.07		117.149		28.7818		77.3956		67.2135
639102	1	670		1.51614		4.56		0.280702		8888.34		1949.2		0.789474		0.892		6.056		116.341		31.9928		62.6883		70.8141
662201	2	735	737.5	1.54634	1.51055	6.14	6.11333	0.2443	22.4279	8553.1	8065.79	1393.01	1312.96	0.811321	83.737	0.85	84.4595	6.488	6.48167	143.056	142.936	29.6214	28.267	64.2546	66.217	67.2135	66.783
432809	2	805	21.399	1.38788	0.0313349	7.24	0.482484	0.262431	25.3272	12158.3	944.843	1679.33	88.5915	0.862385	90.7392	0.898	91.0634	6.158	0.0767566	122.319	4.97743	30.8158	30.216	68.2249	72.283	71.3749	72.606
393055	2	750		1.60711		6.78		0.20059	19.6548	7856.63		1158.8		0.72381	75.2264	0.73	76.4382	6.69		156.838		26.6073	26.317	58.2955	60.15	58.6936	60.961
629865	2	780		1.50879		7.16		0.195531		7861.11		1097.92		0.862385		0.854		6.416		138.346		26.2436		68.2249		67.5362
634332	2	675		1.46319		4.5		0.208889		5264.45		1169.88		0.794393		0.784		6.636		153.071		27.1965		63.0354		62.3054
361992	2	680		1.55		4.86		0.238683		6701.11		1378.83		0.935484		0.92		6.502		143.984		29.2455		75.2856		73.5701
665572	3	675	679.167	1.40466	1.44543	4.32	4.53	0.217593	21.417	8731.13	9005.35	2021.1	1989.64	0.861635	75.5527	0.788	57.5924	5.416	5.53433	83.2165	88.9144	27.8053	27.567	68.1626	60.367	62.5848	49.367
626835	3	680	4.72875	1.44387	0.0187901	4.54	0.0982174	0.211454	21.9623	7448.82	413.298	1640.71	87.2216	0.847328	92.8025	0.708	78.3706	5.75	0.0531298	99.5811	2.5949	27.3768	27.946	66.9999	74.438	57.2912	62.285
641513	3	700		1.42274		4.88		0.217213	20.8754	9231.71		1891.74		0.816901	52.2594	0.676	35.2963	5.494		86.8639		27.7789	27.187	64.6656	46.295	55.3048	36.449
622425	3	675		1.53473		4.72		0.216102		10592.5		2244.18		0.460123		0.25		5.406		82.7564		27.7016		42.7128		30
362664	3	665		1.44179		4.24		0.216981		9181.27		2165.4		0.492188		0.4		5.528		88.4866		27.7628		44.5524		39.2315
630189	3	680		1.42479		4.48		0.205357		8846.65		1974.7		0.932773		0.618		5.612		92.582		26.9468		74.9726		51.8253
628598	4	655	647.857	1.45902	1.46901	4.1	4.03429	0.234146	17.5754	7834.91	6563.8	1910.95	1618.85	0.849558	65.9711	0.688	53.4634	5.736	5.57114	98.8555	91.1427	28.9396	24.786	67.178	54.314	56.0431	46.986
654400	4	590	13.041	1.38281	0.0347812	2.84	0.285681	0.169014	22.0172	4206.11	855.279	1481.03	176.019	0.742424	80.5045	0.8	75.4791	5.602	0.103565	92.0879	5.19604	24.2748	27.984	59.5013	63.798	63.4349	60.318
616938	4	705		1.52967		5.36		0.16791	13.5372	8512.52		1588.16		0.647059	49.705	0.3	30.7111	5.482		86.296		24.1903	21.588	53.5523	44.831	33.2109	33.654
619854	4	645		1.43104		3.84		0.1875		7327.52		1908.21		0.722973		0.5		5.402		82.5728		25.6589		58.2419		45
645213	4	660		1.34263		3.86		0.0932642		2530.26		655.508		0.6875		0.774		6.062		116.687		17.7817		56.0122		61.615
661560	4	650		1.60218		4.4		0.195455		7770.43		1766.01		0.615385		0.494		5.52		88.103		26.2381		51.6712		44.6562
639394	4	630		1.53571		3.84		0.197917		7764.85		2022.1		0.312057		0.178		5.194		73.3972		26.4156		33.9604		24.9546
663001	5	765	739.167	1.56356	1.55021	7	6.32	0.205714	20.6107	12027.8	10928	1718.25	1724.55	0.668919	69.8574	0.554	63.3064	5.772	5.81867	100.728	103.836	26.9722	27	54.8726	56.7	48.1	52.717
399213	5	775	29.564	1.62411	0.069888	7.56	0.602639	0.214286	23.1012	13504.2	1113.22	1786.27	27.9186	0.644928	77.6739	0.6	71.6861	5.684	0.118069	96.1913	6.50959	27.575	28.727	53.4246	61.803	50.7685	57.852
389358	5	805		1.35337		7.06		0.23796	18.2271	11457		1622.81		0.676768	61.4124	0.6	54.4986	6.314		131.852		29.1969	25.273	55.3519	51.597	50.7685	47.581
418358	5	795		1.45683		7.32		0.199454		13285.4		1814.95		0.699187		0.582		5.694		96.6998		26.5259		56.7383		49.7196
389807	5	650		1.84251		5.06		0.213439		8637.04		1706.93		0.646617		0.68		5.968		111.342		27.5159		53.5258		55.5501
658134	5	645		1.46085		3.92		0.168367		6656.57		1698.1		0.838462		0.77		5.48		86.2015		24.2253		66.3018		61.3418
661694	6	710	774	1.46405	1.37951	5.24	6.404	0.217557	22.4177	10170.4	11626.1	1940.92	1804.51	0.286957	54.3578	0.32	62.0114	5.642	5.7265	94.0747	98.3983	27.8028	28.26	32.3903	47.5	34.4499	51.95
623746	6	770	21.1187	1.26606	0.0604504	5.78	0.441062	0.217993	25.636	10173.5	1323.84	1760.13	121.569	0.903846	93.3039	0.908	97.8259	5.808	0.0350654	102.625	1.80594	27.8331	30.419	71.9355	75.003	72.3432	81.521
418954	6	760		1.40782		6.18		0.190939	19.356	8345.2		1350.36		0.39604	11.6944	0.38	14.4956	5.706		97.3125		25.9104	26.101	38.9997	19.997	38.0567	22.379
649019	6	790		1.54146		7.6		0.239474		15393.3		2025.44		0.529851		0.794		5.75		99.5811		29.2986		46.7113		63.0076
655265	6	840		1.21815		7.22		0.257618		14048		1945.7										30.5015

## Sheet: E2 data
Fish ID	E2 ng/ml						Fish ex 2	mean E2	SE E2
1.1.1	14.58						G1-1	0.92	0.14
1.2.1	13.5						G2-1	0.43	0.01
1.3.1	11.21
1.4.1	13.77		Fish ID is: [Group . Fish # . Sample time]				G1-2	4.05	0.36
1.5.1	12.96						G2-2	4.05	0.71
1.6.1	14.58		groups are:
1.7.1	2.32		1: E2 warm				G1-3	2.91	0.22
2.1.1	< 0.41		2: blank warm				G2-3	2.63	0.22
2.2.1	0.47		3: E2 cool				G3-3	1.65	0.18
2.3.1	3.51		4: blank cool				G4-3	1.43	0.26
2.4.1	< 0.41						G5-3	2.15	0.52
2.5.1	< 0.41		sample times are:				G6-3	1.78	0.19
2.6.1	< 0.41		1: 3 dp implant
2.7.1	< 0.41		2: 7dp implant				G1-4	10.39	0.86
3.1.1	11.34		3: 14 dp implant				G2-4	9.24	1.03
3.2.1	8.1						G3-4	5.77	0.79
3.3.1	10.94						G4-4	2.41	0.43
3.4.1	8.1		assay detection limit is 0.41 ng/ml				G5-4	6.65	1.53
3.5.1	8.64						G6-4	5.11	1.12
3.6.1	8.78
3.7.1	7.56						G1-5	31.15	3.52
4.1.1	< 0.41						G2-5	24.94	2.08
4.2.1	< 0.41						G3-5	19.89	1.95
4.3.1	< 0.41						G4-5	17.73	2.06
4.4.1	< 0.41						G5-5	21.6	1.56
4.5.1	< 0.41						G6-5	17.73	3.23
4.6.1	< 0.41
4.7.1	< 0.41
1.1.2	6.21
1.2.2	11.61
1.3.2	10.67
1.4.2	7.43
1.5.2	9.31
1.6.2	8.64
1.7.2	3.65
2.1.2	< 0.41
2.2.2	< 0.41
2.3.2	< 0.41
2.4.2	< 0.41
2.5.2	< 0.41
2.6.2	< 0.41
2.7.2	< 0.41
3.1.2	7.83
3.2.2	6.62
3.3.2	6.89
3.4.2	6.75
3.5.2	8.24
3.6.2	5.06
3.7.2	6.08
4.1.2	0.42
4.2.2	< 0.41
4.3.2	0.62
4.4.2	0.72
4.5.2	0.76
4.6.2	0.57
4.7.2	< 0.41
1.1.3	8.1
1.2.3	8.91
1.3.3	7.56
1.4.3	8.64
1.5.3	4.73
1.6.3	5.13
1.7.3	5.06
2.1.3	< 0.41
2.2.3	0.52
2.3.3	0.64
2.4.3	< 0.41
2.5.3	< 0.41
2.6.3	1.3
2.7.3	< 0.41
3.1.3	3.51
3.2.3	6.21
3.3.3	2.9
3.4.3	3.04
3.5.3	2.77
3.6.3	3.44
3.7.3	2.24
4.1.3	< 0.41
4.2.3	0.55
4.3.3	< 0.41
4.4.3	0.51
4.5.3	0.41
4.6.3	0.48
4.7.3	0.7

## Sheet: Cort Vtg
Group (sample time)	Cortisol group mean (ng/ml)	Cortisol SE	Vtg group mean	Vtg SE
			(mg/ml)
G1 (1)	15.66	1.95	0.9	0.11
G2 (1)	3.31	1.24	0.51	0.2
G1 (2)	16.38	3.69	1.29	0.14
G2 (2)	10.19	3.85	1.26	0.1
G1 (3)	11.99	1.96	1.08	0.09
G2 (3)	12.35	2.72	1.04	0.13
G3 (3)	8.97	2.88	0.59	0.06
G4(3)	4.29	1.2	0.42	0.11
G5 (3)	18.75	9.51	0.76	0.12
G6 (3)	10.91	2.04	0.55	0.09
G1 (4)	9.56	2.5	1.32	0.15
G2 (4)	10.78	4.74	1.27	0.04
G3 (4)	3.74	1.79	1.46	0.08
G4(4)	9.16	3.02	1.08	0.14
G5 (4)	7.97	1.86	1.03	0.12
G6 (4)	9.63	2.46	0.76	0.17
G1 (5)	8.79	1.19	1.17	0.09
G2 (5)	23.14	6.4	0.72	0.07
G3 (5)	5.65	1.42	1.03	0.13
G4(5)	3.64	1.01	1.07	0.11
G5 (5)	2.4	1.09	0.87	0.12
G6 (5)	2.42	0.97	1.04	0.1

[truncated: 2 more sheets: Fsh Lh, Liver exp]
